# Supplementary material for: Concise, Scalable and Enantioselective Total Synthesis of Prostaglandins
Source: Research Square preprint supplement (doi:10.21203/rs.3.rs-98389/v1), 2020-11-19
Supplement: Supplementary file 1 [file 13bc8849a5c3f57832f44ed9.docx]

**Concise, Scalable and Enantioselective Total Synthesis of Prostaglandins**

Fuhao Zhang1,3, Jingwen Zeng1, Mohan Gao1, Linzhou Wang1, Gen-Qiang Chen1,2*, Yixin Lu3, and Xumu Zhang1,2*

1Department of Chemistry and Shenzhen Grubbs Institute, Southern University of Science and Technology, Shenzhen, 518000, China;

2Med-X, Academy for Advanced Interdisciplinary Studies, Southern University of Science and Technology, Shenzhen, 518000, China;

3Department of Chemistry, National University of Singapore, Science Drive 3, 117543, Singapore;

E-mail: chengq@sustech.edu.cn, zhangxm@sustech.edu.cn.

**Supporting Information**

**Contents**

[1. General information 2](#_Toc50560639)

[2. Optimization of the reaction conditions for the asymmetric hydrogenation. 3](#_Toc50560640)

[3. Detailed synthetic pathway 6](#_Toc50560641)

[4. NMR spectra 38](#_Toc50560642)

[5. HPLC spectra 80](#_Toc50560643)

[6. Crystallographic information 85](#_Toc50560644)

[7. References 88](#_Toc50560645)

# 1. General information

Unless otherwise mentioned, all experiments were carried out under an atmosphere of argon in an argon-filled glovebox or using standard Schlenk techniques. Solvents were dried with standard procedures and degassed with N2. Flash silica gel column chromatography was performed using Tsingdao silica gel (60, particle size 300-400 mesh) and basic Al2O3 (particle size 300-400 mesh). PE refers to 40/60 petroleum ether. EA refers to EtOAc. DCM refers to CH2Cl2. NMR spectra were recorded on Bruker DPX 400 spectrometer at 400 MHz for 1H NMR, 101 MHz for 13C NMR, 376 MHz for 19F NMR or Bruker DPX 600 spectrometer at 600 MHz for 1H NMR, 151 MHz for 13C NMR and 565 MHz for 19F NMR in Methanol-*d*4 or CDCl3 with tetramethylsilane (TMS) as internal standard. Chemical shifts were reported in ppm and coupling constants were given in Hz. Chemical shifts were reported relative to TMS (0.00 ppm), CHCl3 (7.26 ppm) or MeOH (3.31 ppm) for 1H NMR and relative to CDCl3 (77.0 ppm) or Methanol-*d*4 (49.0 ppm) for 13C NMR.

# 2. Optimization of the reaction conditions for the asymmetric hydrogenation.

**A. Procedure for preparing starting material**

To a solution of commercially available **S2** (16.5 g, 160 mmol) in anhydrous THF (270 mL) under Argon (Ar) at -78 oC was added lithium diisopropylamide (LDA, 79.8 mL, 160 mmol, 2.0 M in THF) dropwise *via* syringe. The mixture was stirred for 30 min at -78 oC. A solution of commercially available **S1** (5.60 g, 53.2 mmol) in anhydrous THF (20 mL) was carefully added to the mixture dropwise *via* syringe. The reaction was instantly quenched with saturated aqueous NH4Cl (30 mL) and filtered over a pad of silica gel. The filter liquor was extracted with ethyl acetate (3 × 100 mL). The combined organic layer was washed with brine, dried over anhydrous Na2SO4, and filtered. The solvent was removed under reduced pressure. The crude product was purified by column chromatography on silica gel (4:1 = PE:EA) to give **11** (as an approximately 1.3:1 mixture of ketone form and enol form, 6.09 g, 35.6 mmol, 67%) as light-yellow oil. Data for **11**: R*f* = 0.65 (2:1 = PE:EA). 1H NMR (400 MHz, CDCl3) δ 13.43 (d, *J* = 1.5 Hz, 1H), 6.87 (dq, *J* = 15.8, 6.9 Hz, 1.32H), 6.59 (dq, *J* = 15.5, 6.9 Hz, 1H), 6.15 (dq, *J* = 15.7, 1.7 Hz, 1.32H), 5.83 – 5.78 (m, 1H), 5.34 (s, 1H), 3.66 (s, 2.49H), 3.65 (s, 3H), 3.62 (s, 3.83H), 3.16 (s, 3.64H), 3.16 (s, 3H), 1.88 (dd, *J* = 6.9, 1.7 Hz, 4H), 1.82 (dd, *J* = 7.0, 1.7 Hz, 3H). 13C NMR (101 MHz, CDCl3) δ 192.9, 172.7, 169.3, 168.27, 144.6, 134.9, 131.2, 126.6, 87.1, 61.2, 61.2, 45.3, 31.9, 31.7, 18.2, 18.0. HRMS (ESI) Calcd for C8H14NO3 [M+H]+: 172.0968, found: 172.0967.

**B. General procedure for preparing hydrogenation catalysts.**

**Figure S1. Chiral ligands**

To a 2.0 mL vial was added the catalyst precursor [Ir(COD)Cl]2 (3.3 mg, 5 × 10-3 mmol), ligands (10 × 10-3 mmol) (**L1**1, **L2**, **L3**2, **L4**2, **L5**, **L6**3) and anhydrous *i*PrOH (1.0 mL) in an argon-filled glovebox. The mixture was stirred for 2.0 h at 25 oC giving orange catalysts solution (10 μmol/mL) for later use.

**C. General procedure for hydrogenation conditions screening (S/C = 1000).**

To solution of substrate **11** (34 mg, 0.2 mmol) in solvent (2 mL) was added freshly prepared catalyst solution (20 μL, 10 μmol/mL) and base (0.01 mmol) in an argon-filled glovebox. The vial was transferred to an autoclave, which was then charged with 60 atm of H2 and stirred at room temperature (RT) for 24 h. The hydrogen gas was released slowly and the reaction mixture was concentrated and filtered over a pad of silica gel to remove the metal complex. The enantiomeric excess of the product was determined by HPLC on Chiralpak OD-H column, hexane:isopropanol = 99:1; flow rate = 1.0 mL/min; UV detection at 220 nm; tR(*S*) = 26.96 min (minor), tR(*R*) = 37.49 min (major).

**Table S1. Screening ligands, solvents and bases for asymmetric hydrogenation of A*a***

| entry | ligand | Base | solvent | conversion (%)*b* | ee (%)*c* |
| --- | --- | --- | --- | --- | --- |
| 1 | **L1** | K2CO3 | THF | ~45 | 86 |
| 2 | **L2** | K2CO3 | THF | ~20 | 85 |
| 3 | **L3** | K2CO3 | THF | ~35 | 82 |
| 4 | **L4** | K2CO3 | THF | ~30 | 85 |
| 5 | **L5** | K2CO3 | THF | ~35 | 83 |
| 6 | **L6** | K2CO3 | THF | <5 | ‑‑ |
| 7 | **L1** | K2CO3 | *i*PrOH | ~70*d* | 87 |
| 8 | **L1** | K2CO3 | toluene | ~20 | 94 |
| 9 | **L1** | K2CO3 | CH2Cl2 | ~30 | 82 |
| 10 | **L1** | K2CO3 | ethyl acetate | ~25 | 88 |
| 11 | **L1** | K2CO3 | hexane | <5 | ‑‑ |
| 12 | **L1** | Cs2CO3 | toluene | ~35 | 93 |
| 13 | **L1** | KO*t*Bu | toluene | ~90 | 93 |
| 14 | **L1** | KOH | toluene | >99 | 87 |
| 15 | **L1** | KOMe | toluene | ~95 | 94 |
| *a* Reaction conditions: 0.2 mmol scale, [substrate] = 0.1 M, 0.1 mol % [Ir(COD)Cl]2/ligand, 5.0 mol % base, 2.0 mL of solvent, RT (25−30 °C). *b*Determined by 1 H NMR analysis. *c*Determined by HPLC analysis. *d*Only trace amount product. | | | | | |

**D. Optimized procedure for hydrogenation reaction.**

Optimized procedure for hydrogenation reaction in 1.0 mmol scale with [Ir(COD)Cl]2/**L1**as catalyst: To a solution of **11** (171 mg, 1.0 mmol) in 10 mL toluene was added the freshly prepared catalyst solution (0.1 mL, 10 μmmol/mL) *via* syringe and KOMe (3.5 mg, 0.05 mmol) in an argon-filled glovebox. The reaction mixture was transferred to an autoclave, which was then charged with 60 atm of H2 and stirred at room temperature for 24 h. The hydrogen gas was released slowly and the reaction mixture was concentrated and filtered over a pad of silica gel to remove the metal complex. The solvent was removed under reduced pressure to give crude product. The crude product was purified by silica gel column chromatography (1:1 = PE:EA) to give **S3** (127 mg, 0.73 mmol, 73%) as colorless oil. Data for **S3**: R*f* = 0.32 (1:1 = PE:EA). 1H NMR (400 MHz, CDCl3) δ 5.77 – 5.68 (m, 1H), 5.55 – 5.48 (m, 1H), 4.56 – 4.42 (m, 1H), 3.82 (d, *J* = 3.3 Hz, 1H), 3.66 (s, 3H), 3.17 (s, 3H), 2.74 – 2.49 (m, 2H), 1.69 – 1.67 (m, 3H). 13C NMR (101 MHz, CDCl3) δ 173.5, 132.3, 127.1, 68.9, 61.4, 38.5, 31.9, 17.8. HRMS (ESI) Calcd for C8H15NO3Na [M+Na]+: 196.0944, found: 196.0943. [α]: +44.7 (*c* = 1.0, CHCl3). (lit.4: [α] = +48.4,*c* = 1.94, CHCl3).

# 3. Detailed synthetic pathway

**Figure S2. Synthesis of key intermediates**

**A. One-pot procedure for preparing 18**

To a solution of **11** (3.5 g, 20.5 mmol) in 200 mL toluene was added the freshly prepared catalyst solution (2 mL, 10 μmmol/mL) *via* syringe and KOMe (71 mg, 1 mmol) in an argon-filled glovebox. The reaction mixture was transferred to an autoclave, which was then charged with 60 atm of H2 and stirred at room temperature for 24 h. The hydrogen gas was released slowly and the reaction mixture was concentrated under reduced pressure to give crude reduced product which used for the next step directly without purification. The crude product was dissolved into 20 mL anhydrous DMF. Imidazole (2.7 g, 41 mmol) and TBSCl (4.5 g, 31 mmol) were added into the reaction mixture at 0 oC. The reaction was quenched with saturated aqueous NaHCO3 (30 mL) and extracted with DCM (3 × 50 mL). The combined organic layer was washed with brine, dried over anhydrous Na2SO4, and filtered. The solvent was removed under reduced pressure to give crude product. The crude product was purified by silica gel column chromatography (12:1 = PE:EA) to give **18** (4.1 g, 14.4 mmol, 70%) as colorless oil. Data for **18**: R*f* = 0.54 (8:1 = PE:EA). 1H NMR (600 MHz, CDCl3) δ 5.67 – 5.61 (m,1H), 5.49 – 5.46 (m, 1H), 4.62 (q, *J* = 6.5 Hz, 1H), 3.68 (s, 3H), 3.16 (s, 3H), 2.92 – 2.68 (m, 1H), 2.37 (dd, *J* = 14.2, 4.0 Hz, 1H), 1.66 (d, *J* = 6.4 Hz, 3H), 0.85 (s, 9H), 0.03 (d, *J* = 4.4 Hz, 6H). 13C NMR (151 MHz, CDCl3) δ 172.1, 134.0, 125.7, 70.7, 61.5, 40.8, 32.1, 26.0, 18.3, 17.7, -4.3, -4.8. HRMS (ESI) Calcd for C14H30NO3Si [M+H]+: 288.1989, found: 288.1986. [α]: +25.5 (*c* = 1.0, CHCl3).

To a solution of reported compound **19**5(24 g, 245 mmol) in anhydrous THF (100 mL) under Ar at -78 oC was added *n*BuLi (102 mL, 2.4 M in hexane) dropwise *via* syringe. The mixture was warmed to -20 oC after being stirred for 30 min at -78 oC. A solution of **18** (20 g, 70 mmol) in anhydrous THF (50 mL) was added to the mixture dropwise *via* syringe. The mixture was stirred for 1 h. The reaction was quenched with saturated aqueous NH4Cl (50 mL) and extracted with ethyl acetate (3 × 100 mL). The combined organic layer was washed with brine, dried over anhydrous Na2SO4, and filtered. The solvent was removed under reduced pressure to give brown oil. The crude product was purified by silica gel column chromatography (8:1 = PE:EA) to give **17** (21.8 g, 67.2 mmol, 96%) as light-yellow oil. Data for **17**: R*f* = 0.65 (8:1 = PE:EA). 1H NMR (400 MHz, CDCl3) δ 5.82 (s, 1H), 5.69 – 5.59 (m, 1H), 5.45 – 5.38 (m, 1H), 4.73 – 4.56 (m, 1H), 4.09 – 3.96 (m, 4H), 2.81 (dd, *J* = 14.9, 8.2 Hz, 1H), 2.62 (dd, *J* = 14.9, 4.9 Hz, 1H), 1.67 (dd, *J* = 6.7, 1.6 Hz, 3H), 0.85 (s, 9H), 0.03 (d, *J* = 11.5 Hz, 6H). 13C NMR (101 MHz, CDCl3) δ 185.0, 133.0, 126.6, 92.6, 85.3, 82.7, 70.1, 64.6, 54.0, 25.7, 18.1, 17.5, -4.2, -5.1. HRMS (ESI) Calcd for C17H28O4SiNa [M+Na]+: 347.1649, found: 347.1653. [α]: +2.7 (*c* = 1.0, CHCl3).

**B. Evaluation of substrates for Zhang enyne cycloisomerization**

**Figure S3. Evaluation of substrates for enyne cycloisomerization**

In argon-filled glovebox, to a solution of **17** (17.3 g, 53.4 mmol) in degassed 1,2-dichloroethane (DCE) (900 mL) at room temperature was added [Rh(COD)Cl]2 (1.3 g, 0.33 mmol), (*S*)-BINAP (3.3 g, 5.34 mmol) and AgSbF6 (3.68 g, 6.41 mmol) successively. The mixture was stirred for 5 min at room temperature. The resulting mixture was filtered over a pad of silica gel then concentrated in *vacuo*. The crude residue was purified by silica gel column chromatography (8:1 = PE:EA) to give **16** (14.8 g, 45.4 mmol, 85%, 98% ee) as light yellow oil. The enantiomeric excess of the product was determined by HPLC on Chiralpak OD-H column, hexane:isopropanol = 99:1; flow rate = 1.0 mL/min; UV detection at 254 nm; tR = 8.39 min (major), tR = 10.25 min (minor). Data for **16**: R*f* = 0.62 (8:1 = PE:EA). 1H NMR (600 MHz, CDCl3) δ 6.30 (d, *J* = 7.4 Hz, 1H), 5.66 (d, *J* = 7.4 Hz, 1H), 5.61 (dt, *J* = 17.5, 9.1 Hz, 1H), 5.27 (d, *J* = 10.1 Hz, 1H), 5.21 (d, *J* = 17.0 Hz, 1H), 4.06 (q, *J* = 7.5 Hz, 1H), 4.01 – 3.90 (m, 4H), 3.24 (t, *J* = 7.6 Hz, 1H), 2.67 (dd, *J* = 17.9, 6.7 Hz, 1H), 2.35 (dd, *J* = 17.9, 8.4 Hz, 1H), 0.85 (s, 9H), 0.02 (s, 6H). 13C NMR (101 MHz, CDCl3) δ 203.0, 142.5, 136.0, 134.7, 119.8, 96.8, 72.2, 65.2, 57.0, 48.1, 25.7, 18.0, -4.69, -4.74. HRMS (ESI) Calcd for C17H29O4Si [M+H]+: 325.1830, found: 325.1828. [α]: –104.5 (*c* = 1.0, CHCl3).

**C. One pot procedure for preparing key intermediate 12**

To a solution of **16** (200 mg, 0.61 mmol) and Ph2SiH2 (123 mg, 0.67 mmol) in anhydrous and degassed THF (10 mL) under Ar was added Pd(PPh3)4 (14 mg , 0.012 mmol) and anhydrous ZnCl2 (91 mg, 0.67 mmol). The mixture was warmed to 50 oC and stirred at the same temperature. H2O (11 μL, 0.61 mmol) was then added to the reaction. After 5 min, the reaction was cooled to -78 oC and LiHBEt3 (1.83 mL, 1.0 M in THF) was added dropwise *via* syringe. The mixture was stirred for 1 h at the same temperature. The reaction was then quenched with 1 N HCl (5 mL) and warmed to room temperature. After being stirred for 2 h at the same temperature, the reaction was then quenched with saturated aqueous NaHCO3 (10 mL) and extracted with THF (5 × 10 mL). The combined organic layer was dried over anhydrous Na2SO4, and filtered. The solvent was removed under reduced pressure to afford crude residue which was purified by basic Al2O3 column chromatography (EA:MeOH = 20:1) to give **12** (as an approximately 1.4:1 mixture of diastereoisomers, 78 mg, 0.45 mmol, 74%) as yellow oil. Data for **12**: R*f* = 0.40 (1:1 = PE:EA). 1H NMR (600 MHz, CDCl3) δ 5.75 – 5.64 (m, 4H), 5.57 (d, *J* = 5.7 Hz, 1H), 5.15 – 5.06 (m, 5H), 4.67 (td, *J* = 6.6, 3.2 Hz, 1.42 H), 4.63 (td, *J* = 7.2, 3.5 Hz, 1H), 3.95 (q, *J* = 5.9 Hz, 2.53H), 2.77 (q, *J* = 6.9 Hz, 1.27H), 2.67 (br, 1.52H), 2.58 – 2.45 (m, 2.71H), 2.35 (dq, *J* = 14.4, 7.0 Hz, 2.80H), 2.30 – 2.21 (m, 2.73H), 2.14 – 2.10 (m, 1.79H), 2.09 – 1.99 (m, 5.19H), 1.83 – 1.79 (m, 1.66H), 1.64 (br, 4H). 13C NMR (151 MHz, CDCl3) δ 139.5, 138.7, 116.4, 115.6, 101.1, 99.9, 84.4, 81.2, 78.6, 78.4, 58.9, 58.6, 46.5, 45.4, 42.6, 39.6, 39.5. HRMS (ESI) Calcd for C9H14O3Na [M+Na]+: 193.0835, found: 193.0834. [α]: –23.5 (*c* = 1.0, CH2Cl2).

**D. One pot procedure for preparing key intermediate 20**

To a solution of **16** (200 mg, 0.61 mmol) and Ph2SiH2 (123 mg, 0.67 mmol) in anhydrous and degassed THF (10 mL) under Ar was added Pd(PPh3)4 (14 mg , 0.012 mmol) and anhydrous ZnCl2 (91 mg, 0.67 mmol). The mixture was warmed to 50 oC and was stirred at the same temperature until complete consumption of the starting material. H2O (11 μL, 0.61 mmol) was then added to the reaction. After 5 min, the reaction was cooled to -78 oC and LiBHEt3 (1.83 mL, 1.0 M in THF) was added dropwise *via* syringe. The mixture was stirred for 1 h at the same temperature. The reaction was then quenched with H2O (0.1 mL, 6.1 mmol) and warmed to room temperature. After being stirred for 2 h at the same temperature, the reaction solvent was removed under reduced pressure and dried under high vacuum. The residue was then dissolved in anhydrous THF (10 mL). Anhydrous Na2SO4 (200 mg), KF (117 mg, 3.05 mmol) and TBAF (3.1 mL, 1.0 M in THF) were added to the reaction. The mixture was stirred for 12 h at room temperature. Reaction solvent was removed under reduced pressure to afford a crude residue which was purified by silica gel column chromatography (1:1 = PE:EA) to give **20** (94 mg, 0.43 mmol, 71%) as colorless oil. Data for **20**: R*f* = 0.40 (1:1 = PE:EA). 1H NMR (400 MHz, CDCl3) δ 5.62 (m, 1H), 5.14 – 5.04 (m, 2H), 4.89 (dd, *J* = 5.1, 3.0 Hz, 1H), 4.22 (t, *J* = 5.1 Hz, 1H), 4.05 – 3.93 (m, 2H), 3.91 – 3.80 (m, 3H), 3.10 (br, 1H), 2.54 (br, 1H), 2.33 – 2.20 (m, 2H), 1.95 – 1.81 (m, 2H), 1.79 – 1.68 (m, 2H). 13C NMR (101 MHz, CDCl3) δ 139.1, 116.6, 103.8, 77.3, 72.3, 65.1, 64.6, 57.6, 44.9, 41.8, 31.1. HRMS (ESI) Calcd for C11H18O4Na [M+Na]+: 237.1097, found: 237.1095. [α]: +13.0 (*c* = 1.0, MeOH).

**E. Stepwise procedures for preparing key intermediate 20**

To a solution of **16** (24.2 g, 74.7 mmol) and Sn*n*Bu3H(13.6 g, 127 mmol) in anhydrous and degassed THF (200 mL) under Ar was added Pd(PPh3)4 (1.7 g , 1.5 mmol) and anhydrous ZnCl2 (11.2g, 82.2 mmol). The mixture was warmed to 50 oC and was stirred at the same temperature until complete consumption of the starting material. The reaction was quenched with saturated aqueous NH4Cl (30 mL) and extracted with ethyl acetate (3 × 100 mL). The combined organic layer was washed with brine, dried over anhydrous Na2SO4, and filtered. The solvent was removed under reduced pressure to afford a crude residue. The crude product was purified by silica gel column chromatography (10:1 = PE:EA) to give **S4** (20.2 g, 62 mmol, 83%) as yellow oil. Data for **S4**: R*f* = 0.62 (8:1 = PE:EA). 1H NMR (600 MHz, CDCl3) δ 5.74 – 5.68 (m, 1H), 5.23 – 5.13 (m, 2H), 5.09 (s, 1H), 4.02 (q, *J* = 7.3 Hz, 1H), 3.94 – 3.76 (m, 4H), 2.61 (dd, *J* = 18.3, 6.9 Hz, 1H), 2.50 (q, *J* = 9.1 Hz, 1H), 2.23 – 2.17 (m, 2H), 2.01 – 1.92 (m, 1H), 1.79 – 1.76 (m, 1H), 0.84 (s, 9H), 0.01 (d, *J* = 4.0 Hz, 6H). 13C NMR (151 MHz, CDCl3) δ 214.6, 137.8, 117.7, 102.2, 72.8, 64.7, 64.5, 55.5, 49.6, 46.8, 32.1, 25.6, 18.0, -4.8. HRMS (ESI) Calcd for C17H31O4Si [M+H]+:327.1986, found: 327.1984. [α]: –68.6 (*c* = 1.0, CHCl3).

To a solution of **S4** (20.8 g, 63.8 mmol) (2.10 g, 6.44 mmol) in anhydrous THF (200 mL) under Ar at -78 oC was added LiBHEt3 (95.7 mL, 1 M in THF) dropwise *via* syringe. The mixture was stirred for 1 h at the same temperature. The reaction was quenched with saturated aqueous NH4Cl (100 mL) and extracted with ethyl acetate (3 × 100 mL). The combined organic layer was washed with brine, dried over anhydrous Na2SO4, and filtered. The solvent was removed under reduced pressure to afford crude residue. The crude residue was purified by silica gel column chromatography (6:1 = PE:EA) to give **S5** (17.8 g, 54.2 mmol, 85%) as colorless oil. Data for **S5**: R*f* = 0.45 (4:1 = PE:EA). 1H NMR (400 MHz, CDCl3) δ 5.61 – 5.48 (m, 1H), 5.11 – 5.05 (m, 1H), 5.04 (s, 1H), 4.91 (dd, *J* = 5.0, 3.6 Hz, 1H), 4.16 (td, *J* = 5.8, 2.6 Hz, 1H), 4.03 – 3.93 (m, 2H), 3.91 – 3.80 (m, 3H), 2.31 – 2.19 (m, 2H), 1.97 – 1.89 (m, 1H), 1.84 – 1.79 (m, 1H), 1.73 – 1.63 (m, 2H), 0.85 (s, 9H), 0.01 (d, *J* = 2.2 Hz, 6H). 13C NMR (101 MHz, CDCl3) δ 139.3, 116.6, 103.9, 77.7, 71.9, 65.0, 64.6, 56.8, 44.2, 42.8, 31.1, 25.8, 18.0, -4.6, -4.7. HRMS (ESI) Calcd for C17H32O4SiNa [M+Na]+: 351.1962, found: 351.1959. [α]: +7.4 (*c* = 1.0, MeOH).

To a solution of **S5** (28.1 g, 85.1 mmol) in THF (100 mL) at room temperature was added TBAF (128 mL, 1.0 M in THF) dropwise *via* syringe. The mixture was stirred until complete consumption of the starting material. Reaction solvent was removed under reduced pressure to afford crude residue which was purified by silica gel column chromatography (1:1 = PE:EA) to give **20** (17.9 g, 83.4 mmol, 98%) as yellow oil.

**F. Derivatization of (±)-S5 for X-ray diffraction**

**Figure S4. Derivatization of (±)-S5 for X-ray diffraction**

To a solution of **(±)-S5** (100 mg, 0.3 mmol) in DCM (50 mL) at 0 oC was added NEt3 (61 mg, 0.6 mmol), 4-nitrobenzoyl chloride (83 mg, 0.45 mmol) and DMAP (4 mg, 0.03 mmol). The mixture was warmed to RT and stirred for 5 h. The reaction was quenched with saturated aqueous NaHCO3 (10 mL) and extracted with DCM (3 × 10 mL). The combined organic layer was washed with brine, dried over anhydrous Na2SO4, and filtered. The solvent was removed under reduced pressure to afford crude residue. The crude product was purified by silica gel column chromatography (10:1 = PE:EA) to give **(±)-S15** (117 mg, 0.24 mmol, 84%) as yellow oil. Data for **(±)-S15**: R*f* = 0.63 (8:1 = PE:EA). 1H NMR (400 MHz, CDCl3) δ 8.32 – 8.24 (m, 2H), 8.24 – 8.17 (m, 2H), ), 5.69 – 5.59 (m, 1H), 5.46 – 5.37 (m, 1H), 5.22 – 5.12 (m, 2H), 4.87 (t, *J* = 4.6 Hz, 1H), ), 4.00 – 3.95 (m, 1H), 3.91 – 3.74 (m, 4H), 2.60 – 2.42 (m, 2H), 2.05 – 1.88 (m, 2H), 1.83 – 1.74 (m, 2H), 0.80 (s, 9H), -0.02 (d, *J* = 12.5 Hz, 6H). 13C NMR (101 MHz, CDCl3) δ 164.2, 150.4, 138.7, 136.1, 130.7, 123.5, 117.7, 103.0, 76.73, 76.7, 64.8, 64.7, 57.6, 42.4, 42.3, 31.2, 25.7, 17.9, -4.6, -4.8. HRMS (ESI) Calcd for C24H36NO7Si [M+H]+: 478.2256, found: 478.2251.

To a solution of **(±)-S15** (117 mg, 0.24 mmol) in MeOH (50 mL) at 0 oC was added one drop of AcCl. The mixture was warmed to RT and stirred for 1 h. The reaction was quenched with saturated aqueous NaHCO3 (10 mL) and extracted with ethyl acetate (3 × 10 mL). The combined organic layer was washed with brine, dried over anhydrous Na2SO4, and filtered. The solvent was removed under reduced pressure to provide a crude residue. The crude product was purified by silica gel column chromatography (8:1 = PE:EA) to give **(±)-S16** (76 mg, 0.21 mmol, 82%) as yellow oil. Data for **(±)-S16**: R*f* = 0.42 (4:1 = PE:EA). 1H NMR (600 MHz, CDCl3) δ 8.28 (d, *J* = 8.7 Hz, 2H), 8.19 (d, *J* = 8.7 Hz, 2H), 5.68 (dt, *J* = 17.2, 9.6 Hz, 1H), 5.42 (t, *J* = 5.0 Hz, 1H), 5.31 – 5.20 (m, 2H), 4.41 (t, *J* = 5.7 Hz, 1H), 4.03 (q, *J* = 7.5 Hz, 1H), 3.24 (s, 3H), 3.22 (s, 3H), 2.67 – 2.62 (m, 1H), 2.45 (dt, *J* = 12.1, 8.4 Hz, 1H), 2.00 (br, 1H), 1.97 – 1.91 (m, 1H), 1.85 – 1.73 (m, 3H). 13C NMR (101 MHz, CDCl3) δ 164.1, 150.5, 138.4, 135.8, 130.6, 123.6, 118.4, 102.8, 76.6, 76.0, 57.5, 53.2, 52.6, 43.1, 41.1, 30.1. HRMS (ESI) Calcd for C18H23NO7 [M]-: 365.1480, found: 365.1474.

To a solution of **(±)-S16** (76 mg, 0.21 mmol) in DCM (5 mL) at 0 oC was added NEt3 (43 mg, 0.42 mmol), 4-nitrobenzene-1-sulfonyl chloride (69 mg, 0.31 mmol). The mixture was warmed to RT and stirred for 10 h. The reaction was then quenched with saturated aqueous NaHCO3 (10 mL) and extracted with DCM (3 × 10 mL). The combined organic layer was washed with brine, dried over anhydrous Na2SO4, and filtered. The solvent was removed under reduced pressure to provide crude residue. The crude product was purified by silica gel column chromatography (10:1 = PE:EA) to give **(±)-21** (85 mg, 0.15 mmol, 75%) as white solid. The single crystal was cultured in hexane and ethyl acetate. Data for **(±)-21**: R*f* = 0.45 (4:1 = PE:EA). 1H NMR (400 MHz, CDCl3) δ 8.35 – 8.34 (m, 1H), 8.33 – 8.32 (m, 2H), 8.30 – 8.29 (m, 1H), 8.21 – 8.14 (m, 2H), 8.06 – 8.00 (m, 2H), 5.57 – 5.39 (m, 2H), 5.15 – 5.03 (m, 2H), 4.77 – 4.73 (m, 1H), 4.37 (t, *J* = 5.5 Hz, 1H), 3.22 (s, 6H), 2.78 – 2.72 (m, 1H), 2.61 – 2.54 (m, 1H), 2.16 (dd, *J* = 16.4, 3.0 Hz, 1H), 1.97 – 1.87 (m, 1H), 1.82 – 1.70 (m, 2H), 1.61 (s, 1H). 13C NMR (101 MHz, CDCl3) δ 163.9, 150.7, 142.2, 135.6, 135.3, 130.7, 129.2, 124.3, 123.7, 119.3, 102.7, 86.3, 76.0, 54.4, 53.5, 52.8, 43.1, 39.4, 29.8. HRMS (ESI) Calcd for C24H26N2O11SNa [M+Na]+: 573.1150, found: 573.1155.

**G. Synthesis of the ω chains**

**Figure S5. Synthesis of the ω chains**

To a solution of **22** (2.6 g, 20 mmol, prepared from comercially available 1-heptene following reported procedure6) in 25 mL *i*PrOH was added the freshly prepared catalyst solution (0.2 mL, 100 μmmol/mL, prepared from [Ir(COD)Cl]2 and **L2** following the general procedure) *via* syringe and K2CO3 (28 mg, 0.2 mmol) in an argon-filled glovebox. The reaction mixture was transferred to an autoclave, which was then charged with 50 atm of H2 and stirred at room temperature for 24 h. The hydrogen gas was released slowly and the reaction mixture was concentrated. The crude product was purified by silica gel column chromatography (2:1 = PE:EA) to give **24** (2.58 g, 19.6 mmol, 98%, 98% ee) as colorless oil. The enantiomeric excess was determined based on the corresponding mono *p*-toluenesulfonyl derivative in the next step. Data for **24**: R*f* = 0.32 (2:1 = PE:EA). 1H NMR (400 MHz, CDCl3) δ 3.79 – 3.54 (m, 2H), 3.42 – 3.38 (m, 1H), 2.96 (br, 2H), 1.52 – 1.36 (m, 3H), 1.34 – 1.25 (m, 5H), 0.88 (t, *J* = 6.8 Hz, 3H). 13C NMR (101 MHz, CDCl3) δ 72.3, 66.7, 33.1, 31.8, 25.2, 22.5, 14.0. HRMS (ESI) Calcd for C7H16O2Na [M+Na]+: 155.1043, found: 155.1045. [α]: –17.2 (*c* = 1.0, EtOH). (lit.7 [α] = –17.5,*c* = 2.92, EtOH).

Following literature-known procedure: to a solution of **24** (2.0 g, 15.2 mmol) in DCM (30 mL) at 0 oC was added pyridine (1.8 g, 22.8 mmol), Tosyl chloride (TsCl) (3.15 g, 16.7 mmol). The mixture was warmed to RT and stirred for 24 h. The reaction was quenched with saturated aqueous NaHCO3 (10 mL) and extracted with ethyl acetate (3 × 30 mL). The combined organic layer was washed with brine, dried over anhydrous Na2SO4, and filtered. The solvent was removed under reduced pressure to provide crude residue. The crude product was purified by silica gel column chromatography (8:1 = PE:EA) to give **S17** (3.68 g, 12.9 mmol, 85%) as colorless oil. The enantiomeric excess was determined by HPLC on Chiralpak OD-H column, hexane:isopropanol = 96:4; flow rate = 1.0 mL/min; UV detection at 220 nm; tR(*R*) = 17.2 min (minor), tR(*S*) = 18.8 min (major). Data for **S17**: R*f* = 0.53 (8:1 = PE:EA). 1H NMR (400 MHz, CDCl3) δ 7.9 – 7.7 (m, 2H), 7.4 (d, *J* = 8.0 Hz, 2H), 4.0 (dd, *J* = 9.7, 2.6 Hz, 1H), 3.9 – 3.8 (m, 2H), 2.5 (s, 3H), 2.1 (d, *J* = 4.6 Hz, 1H), 1.5 – 1.4 (m, 3H), 1.3 – 1.25 (m, 5H), 0.9 (t, *J* = 6.9 Hz, 3H).8

To a solution of NaOH (2.1 g, 52.5 mmol) in Et2O (30 mL) at 0 oC was added **S17** (3.0 g, 10.5 mmol) in Et2O (10 mL) dropwise. The mixture was warmed to RT and stirred for 48 h. The reaction was quenched with H2O (10 mL) and extracted with Et2O (3 × 30 mL). The combined organic layer was washed with brine, dried over anhydrous Na2SO4, and filtered. The solvent was removed under reduced pressure very carefully due to extremely volatile nature of epoxide **26**. The crude epoxide **26** was used for the next step without further purification. According to reported procedure9, to a solution of (Me)3S+I- (10.7 g, 52.5 mmol) in anhydrous THF (100 mL) under Ar at -20 oC was added *n*BuLi (21.9 mL, 2.4 M in hexane) dropwise *via* syringe. The mixture was stirred for 30 min at the same temperature. A solution of crude **26** (from the former step) in anhydrous THF (20 mL) was then added to the mixture dropwise *via* syringe. The mixture was stirred at -20 oC for 30 min and then at room temperature for 3 h. The reaction was quenched with saturated aqueous NH4Cl (30 mL) and filtered over a pad of celite. The filter liquor was extracted with ethyl acetate (3 × 50 mL). The combined organic layer was washed with brine, dried over anhydrous Na2SO4, and filtered. The solvent was removed under reduced pressure very carefully due to extremely volatile nature of **28**. The crude residue was purified by silica gel column chromatography (20:1 = PE:EA) to give **28** (1 g, 7.8 mmol, 74% two steps) as colorless oil. Data for **28**: R*f* = 0.63 (8:1 = PE:EA). 1H NMR (400 MHz, CDCl3) δ 5.86 – 5.78 (m, 1H), 5.17 (dt, *J* = 17.2, 1.4 Hz, 1H), 5.05 (dt, *J* = 10.4, 1.3 Hz, 1H), 4.04 (q, *J* = 6.3 Hz, 1H), 2.27 (br, 1H), 1.55 – 1.42 (m, 2H), 1.38 – 1.23 (m, 6H), 0.86 (t, *J* = 6.9 Hz, 3H). 13C NMR (101 MHz, CDCl3) δ 141.3, 114.5, 73.3, 37.0, 31.7, 25.0, 22.6, 14.0. HRMS (ESI) Calcd for C8H15 [M-H2O+H]+: 111.1168, found: 111.1173. [α]: +18.3 (*c* = 1.0, EtOH). (lit.10 [α] = +19, *c* = 0.21, EtOH).

To a solution of **23** (1.64 g, 10 mmol, prepared from commercially available 4-phenyl-1-buten following reported procedure6) in 25 mL *i*PrOH was added the freshly prepared catalyst solution (0.1 mL, 100 μmmol/mL, prepared from [Ir(COD)Cl]2 and **L1** following the general procedure) *via* syringe and K2CO3 (14 mg, 0.1 mmol) in an argon-filled glovebox. The reaction mixture was transferred to an autoclave, which was then charged with 50 atm of H2 and stirred at room temperature for 24 h. The hydrogen gas was released slowly and the reaction mixture was concentrated. The crude product was purified by silica gel column chromatography (2:1 = PE:EA) to give **25** (1.56 g, 9.3 mmol, 95%, 93% ee) as colorless oil. The enantiomeric excess was determined by HPLC on Chiralpak OD-H column, hexane:isopropanol = 85:15; flow rate = 1.0 mL/min; UV detection at 220 nm; tR(*R*) = 8.45 min (minor), tR(*S*) = 10.97 min (major). Data for **25**: R*f* = 0.32 (2:1 = PE:EA). 1H NMR (400 MHz, CDCl3) δ 7.30 – 7.22 (m, 2H), 7.22 – 7.11 (m, 3H), 3.83 – 3.47 (m, 4H), 3.44 – 3.39 (m, 1H), 2.82 – 2.74 (m, 1H), 2.69 – 2.61 (m, 1H), 1.83 – 1.56 (m, 2H). 13C NMR (101 MHz, CDCl3) δ 141.7, 128.4, 128.3, 125.9, 71.5, 66.6, 34.5, 31.7. HRMS (ESI) Calcd for C10H14O2Na [M+Na]+: 189.0886, found: 189.0889. [α]: –26.4 (*c* = 1.0, EtOH). (lit.11: [α] = –34, *c* = 1.33, EtOH).

To a solution of **25** (1.0 g, 6 mmol) in DCM (10 mL) at 0 oC was added pyridine (0.71 g, 9 mmol), TsCl (1.25 g, 6.6 mmol). The mixture was warmed to RT and stirred for 24 h. The reaction was quenched with saturated aqueous NaHCO3 (10 mL) and extracted with DCM (3 × 10 mL). The combined organic layer was washed with brine, dried over anhydrous Na2SO4, and filtered. The solvent was removed under reduced pressure to provide a crude mono-tosylated product. To a solution of NaOH (1.2 g, 30 mmol) in Et2O (10 mL) at 0 oC was added crude mono-tosylated product in Et2O (10 mL) dropwise. The mixture was warmed to RT and stirred for 48 h. The reaction was quenched with H2O (10 mL) and extracted with Et2O (3 × 10 mL). The combined organic layer was washed with brine, dried over anhydrous Na2SO4. The solvent was removed under reduced to afford crude product which was purified by silica gel column chromatography (20:1 = PE:EA) to give **27** (693mg, 4.7 mmol, 78% two steps) as colorless oil. Data for **27**: R*f* = 0.47 (20:1 = PE:EA). 1H NMR (400 MHz, CDCl3) δ 7.32 – 7.23 (m, 2H), 7.20 – 7.16 (m, 3H), 2.95 – 2.90 (m, 1H), 2.85 – 2.69 (m, 3H), 2.44 (dd, *J* = 5.0, 2.7 Hz, 1H), 1.89 – 1.75 (m, 2H). 13C NMR (101 MHz, CDCl3) δ 141.1, 128.3, 128.2, 125.9, 51.6, 47.1, 34.1, 32.1. HRMS (ESI) Calcd for C10H11 [M-H2O+H]+: 131.0855, found: 131.0858. [α]: –19.1 (*c* = 1.0, CHCl3).

Using the same procedure as that used for preparing compound **28**, epoxide **27** produced **29** (92% yield) as colorless oil after silica gel column chromatography. Data for **29**: R*f* = 0.46 (8:1 = PE:EA). 1H NMR (400 MHz, CDCl3) δ 7.35 – 7.27 (m, 2H), 7.25 – 7.14 (m, 3H), 5.97 – 5.94 (m, 1H), 5.30 – 5.24 (m, 1H), 5.18 – 5.14 (m, 1H), 4.16 – 4.11 (m, 1H), 2.82 – 2.69 (m, 2H), 1.92 – 1.84 (m, 2H). 13C NMR (101 MHz, CDCl3) δ 141.9, 141.1, 128.5, 128.4, 125.9, 114.9, 72.5, 38.5, 31.6. HRMS (ESI) Calcd for C11H13 [M-H2O+H]+: 145.1012, found: 145.1014. [α]: –7.2 (*c* = 1.0, CHCl3). (lit.12: [α]= –6, *c* = 1.0, CHCl3).

Following the well-developed procedure13-16, to freshly activated 4 Å molecular sieves (2.8 g) in anhydrous DCM (20 mL) was added *L*-(+)-diethyl tartrate (1.2 g, 5.9 mmol) in anhydrous DCM (10 mL). The solution was cooled to -20 oC and Ti(O*i*Pr)4 (1.4 g, 4.9 mmol) was added followed by TBHP (5.0 M solution in decane, 3.9 mL, 19.7 mmol). The reaction was stirred for 20 min and then anhydrous DCM (5 mL) solution of reported compound **30**17(1.4 g, 9.9 mmol) was added in to the reaction mixture. After 2 h, the reaction was quenched with 6:1 mixture of acetone: water (5 mL) and stirred for 1 h at room temperature. The reaction mixture was filtered through a pad of celite and rinsed with ethyl acetate. The layers were separated and the aqueous layer was extracted with ethyl acetate. The combined organic layer was washed with brine, dried over anhydrous Na2SO4, and concentrated. The crude product was purified by silica gel column chromatography (10:1 = PE:EA) to give **31** (1.4 g, 9.1 mmol, 92%) as colorless solid. Data for **31**: R*f* = 0.37 (8:1 = PE:EA). 1H NMR (600 MHz, CDCl3) δ 3.81 (dd, *J* = 12.2, 4.1 Hz, 1H), 3.65 (dd, *J* = 12.2, 6.8 Hz, 1H), 2.95 (dd, *J* = 6.8, 4.2 Hz, 1H), 2.42 (br, 1H),1.64 – 1.55 (m, 1H), 1.45 – 1.33 (m, 3H), 1.31 – 1.24 (m, 7H), 0.87 (t, *J* = 7.1 Hz, 3H). 13C NMR (151 MHz, CDCl3) δ 63.0, 61.5, 61.4, 38.4, 31.7, 24.7, 22.5, 16.7, 13.9. HRMS (ESI) Calcd for C9H19O2 [M+H]+: 159.1380, found: 159.1379. [α]: –5.3 (*c* = 1.0, CHCl3). (lit.18: [α] D= –6.2, *c* = 1.48, CHCl3).

According to reported procedure19, to a stirred solution of epoxy alcohol **31** (1.4 g, 8.9 mmol) in anhydrous MTBE:CH3CN (5:3, 20 ml) was added Ph3P (7.0 g, 26.6mmol), pyridine (2.7 g, 33.7 mmol) and I2 (4.5 g, 17.7 mmol) sequentially at 0 oC. After being stirred for 2 h at 0 oC, H2O (160 µl, 8.9 mmol) was added into the reaction mixture. The mixture was refluxed for 6 h at 40 oC, then 20% aqueous Na2S2O3 (20 ml) and saturated aqueous NaHCO3 (20 ml) were added to quench the reaction and the organic layer was extracted with MTBE (3 × 20 ml). The combined organic layer was washed with brine, dried over anhydrous Na2SO4, and filtered. The solvent was removed under reduced pressure very carefully due to extremely volatile nature of **32**. The crude product was purified by silica gel column chromatography (30:1 = PE:EA) to give **32** (970 mg, 6.8 mmol, 77%) as colorless oil. Data for **32**: R*f* = 0.55 (16:1 = PE:EA). 1H NMR (400 MHz, CDCl3) δ 5.91 (dd, *J* = 17.4, 10.8 Hz, 1H), 5.19 (dd, *J* = 17.4, 1.3 Hz, 1H), 5.03 (dd, *J* = 10.8, 1.3 Hz, 1H), 1.54 – 1.48 (m, 3H), 1.32 – 1.26 (m, 8H), 0.87 (t, *J* = 6.9 Hz, 3H). 13C NMR (101 MHz, CDCl3) δ 145.3, 111.4, 73.3, 42.3, 32.2, 27.6, 23.5, 22.6, 14.0. HRMS (ESI) Calcd for C9H17 [M-H2O+H]+: 125.1325, found: 125.1328. [α]: +7.2, (*c* = 1.0, CHCl3).

According to reported literature20, this reaction undergo a epoide ring-opening reaction and a intramolecular substitution reaction. To a solution of commercially available **34** (100 g, 617 mmol) and epichlorohydrin (143 g, 1.5 mol) in 2-butanone (700 mL) at 0 oC was added K2CO3 (170 g, 1234 mmol). Then the mixture was refluxed for 12 h. The reaction was quenched with water (500 mL) and extracted with ethyl acetate (3 × 500 mL). The combined organic layer was washed brine, dried over anhydrous MgSO4, and filtered. The solvent was removed under reduced pressure. The crude product was purified by silica gel column chromatography (16:1 = PE:EA) to give **36** (112 g, 512 mmol, 83%) as colorless oil. Data for **36**: R*f* = 0.57 (8:1 = PE:EA). 1H NMR (600 MHz, CDCl3) δ 7.39 (t, *J* = 8.0 Hz, 1H), 7.22 (d, *J* = 7.7 Hz, 1H), 7.15 (s, 1H), 7.09 (dd, *J* = 8.3, 2.4 Hz, 1H), 4.29 (dd, *J* = 11.0, 2.9 Hz, 1H), 3.95 (dd, *J* = 11.0, 5.9 Hz, 1H), 3.37 – 3.35 (m, 1H), 2.99 – 2.86 (m, 1H), 2.76 (dd, *J* = 4.9, 2.6 Hz, 1H). 13C NMR (151 MHz, CDCl3) δ 158.6, 131.8 (q, *J* = 32.4 Hz), 130.0, 123.9 (q, *J* = 272.4 Hz), 118.1, 117.9 (q, *J* = 3.4 Hz), 111.4 (q, *J* = 4.2 Hz), 69.0, 49.9, 44.4. 19F NMR (565 MHz, CDCl3) δ -62.7. HRMS (ESI) Calcd for C10H8F3O [M-H2O+H]+: 201.0522, found: 201.0525. [α]: –5.0, (*c* = 1.0, CHCl3).

Using the same procedure (scaled up proportionally) as that used for preparing **28**, epoxide **36** (15.0 g, 68.8 mmol) produced **38** (17.2 g, 84.1 mmol, 91%) as colorless oil after silica gel column chromatography (10:1 = PE:EA). Data for **38**: R*f* = 0.46 (8:1 = PE:EA). 1H NMR (400 MHz, CDCl3) δ 7.39 (t, *J* = 8.0 Hz, 1H), 7.23 (d, *J* = 7.7 Hz, 1H), 7.15 (s, 1H), 7.09 (dd, *J* = 8.3, 2.4 Hz, 1H), 6.00 – 5.92 (m, 1H), 5.47 (dt, *J* = 17.3, 1.4 Hz, 1H), 5.31 (dt, *J* = 10.6, 1.3 Hz, 1H), 4.59 – 4.54 (m, 1H), 4.05 (dd, *J* = 9.4, 3.4 Hz, 1H), 3.93 (dd, *J* = 9.4, 7.5 Hz, 1H), 2.44 (d, *J* = 3.9 Hz, 1H). 13C NMR (101 MHz, CDCl3) δ 158.6, 135.8, 131.8 (q, *J* = 32.4 Hz), 130.0, 123.9 (q, *J* = 272.3 Hz), 118.0, 117.8 (q, *J* = 3.8 Hz), 117.3, 111.4 (q, *J* = 3.8 Hz), 71.8, 71.0. 19F NMR (565 MHz, CDCl3) δ -62.73. HRMS (ESI) Calcd for C11H10F3O [M-H2O+H]+: 215.0678, found: 215.0681. [α]: –7.6 (*c* = 1.0, CHCl3).

Using the same procedure as that used for preparing **36**, **33** (2.0 g, 15.6 mmol) produced **35** (2.3 g, 12.6 mmol, 81%) as colorless oil after silica gel column chromatography (10:1 = PE:EA). Data for **35**: R*f* = 0.45 (8:1 = PE:EA). 1H NMR (400 MHz, CDCl3) δ 7.17 (t, *J* = 8.1 Hz, 1H), 6.94 – 6.93 (m, 1H), 6.90 (t, *J* = 2.2 Hz, 1H), 6.80 – 6.77 (m, 1H), 4.20 (dd, *J* = 11.0, 2.9 Hz, 1H), 3.85 (dd, *J* = 11.0, 5.9 Hz, 1H), 3.33 – 3.29 (m, 1H), 2.87 (dd, *J* = 4.8, 4.2 Hz, 1H), 2.71 (dd, *J* = 4.9, 2.7 Hz, 1H). 13C NMR (101 MHz, CDCl3) δ 159.0, 134.6, 130.1, 121.2, 114.9, 112.9, 68.8, 49.7, 44.3. HRMS (ESI) Calcd for C9H8ClO [M-H2O+H]+: 167.0258, found: 167.0261. [α]: –7.6 (*c* = 1.0, EtOH) (lit.21: [α] D = –9.1, *c* = 1.91, EtOH).

Using the same procedure (scaled up proportionally) as that used for preparing **28**, epoxide **35** (5.0 g, 27.2 mmol) produced **37** (4.9 g, 24. 5 mmol, 90%) as colorless oil after silica gel column chromatography (10:1 = PE:EA). Data for **37**: R*f* = 0.46 (8:1 = PE:EA). 1H NMR (400 MHz, CDCl3) δ 7.19 (t, *J* = 8.1 Hz, 1H), 6.96 – 6.94 (m, 1H), 6.91 (t, *J* = 2.2 Hz, 1H), 6.82 – 6.79 (m, 1H), 5.98 – 5.89 (m, 1H), 5.45 (dt, *J* = 17.3, 1.4 Hz, 1H), 5.29 (dt, *J* = 10.6, 1.3 Hz, 1H), 4.62 – 4.47 (m, 1H), 3.99 (dd, *J* = 9.4, 3.5 Hz, 1H), 3.87 (dd, *J* = 9.4, 7.6 Hz, 1H), 2.58 (d, *J* = 3.7 Hz, 1H). 13C NMR (101 MHz, CDCl3) δ 159.1, 135.8, 134.8, 130.2, 121.4, 117.3, 115.0, 113.0, 71.8, 71.0. HRMS (ESI) Calcd for C10H10ClO [M-H2O+H]+: 181.0415, found: 181.0417. [α]: –10.5 (*c* = 1.0, CHCl3)

**H. Synthesis of prostaglandins from key intermediates**

**Figure S6. Synthesis of prostaglandins from key intermediates**

In argon-filled glovebox, compound **12** (40 mg, 0.23 mmol), **28** (295 mg, 2.3 mmol) and Hoveyda-Grubbs 2nd catalyst (29 mg, 0.047 mmol) were dissolved in degassed DCM (1 mL) in three flasks, respectively. The solution of **12** was heat to 40 oC. The solution of **28** and Hoveyda-Grubbs 2nd catalyst were added every 5 min into the solution of **12** *via* respective syringe at the same time (5 portions, 0.2 mL each time). The mixture was stirred for 5 min after complete adding of **28** and Hoveyda-Grubbs 2nd catalyst. The solvent was removed under reduced pressure. The resulted crude residue was purified by silica gel column chromatography (1:1 = PE:EA) to obtain **15** (42 mg, 0.16 mmol, 66%, as an approximately 1.3:1 mixture of diastereoisomers) as light black oil. Data for **15**: R*f* = 0.43 (ethyl acetate). 1H NMR (400 MHz, CDCl3) δ 5.64 (dd, *J* = 4.7, 1.9 Hz, 1.24H), 5.60 – 5.49 (m, 3.23H), 5.47 – 5.41 (m, 2.17H), 4.59 (td, *J* = 6.7, 3.7 Hz, 1.3H), 4.54 (td, *J* = 7.2, 4.2 Hz, 1H), 4.05 – 3.99 (m, 2.38H), 3.92 – 3.75 (m, 3.40H), 3.59 (br, 1.27H), 3.01 (br, 2H), 2.70 (q, *J* = 8.1 Hz, 1H), 2.43 – 2.32 (m, 4.59H), 2.16 – 2.06 (m, 2.49H), 2.04 – 1.91 (m, 4.53H), 1.74 – 1.68 (m, 1.27H), 1.57 – 1.53 (m, 2.36H), 1.49 – 1.40 (m, 2.38H), 1.34 – 1.25 (m, 12.33H), 0.98 – 0.79 (m, 6.79H). 13C NMR (101 MHz, CDCl3) δ 135.6, 135.1, 132.7, 131.9, 100.7, 99.7, 83.3, 80.3, 78.0, 77.9, 73.1, 73.0, 57.1, 56.7, 46.4, 45.6, 42.4, 39.7, 38.9, 38.6, 37.0, 31.7, 31.67, 25.2, 25.1, 22.6, 14.0. HRMS (ESI) Calcd for C15H26O4Na [M+Na]+: 293.1723, found: 293.1718. [α]: –1.5 (*c* = 1.0, MeOH).

To a suspension of commercially available **39** (921 mg, 2.07 mmol) in anhydrous THF (10 mL) at 0 oC under Ar was added KO*t*Bu (466 mg, 4.15 mmol) in one portion. The orange mixture was stirred for 40 min at the same temperature. A solution of **15** (70 mg, 0.26 mmol) in anhydrous THF (4.0 ml) was added dropwise via syringe at 0 oC. The mixture was warmed to room temperature and stirred for 2 h. The reaction was quenched with H2O (25 ml) and washed with Et2O (10 ml). The aqueous phase was made acidic with 1 M HCl (4.5 ml) and extracted with DCM (5 × 10 ml). The combined organic phases were dried over anhydrous Na2SO4, filtered, and concentrated to give the crude residue. The crude product was purified by silica gel column chromatography (ethyl acetate) to give **PGF2α** (51 mg, 0.143 mmol, 55%) as colorless oil. Data for **PGF2α**: R*f* = 0.53 (20:1 = EA:MeOH); 1H NMR (600 MHz, CDCl3) δ 5.56 (dd, *J* = 15.3, 7.0 Hz, 1H), 5.52 – 5.42 (m, 2H), 5.39 – 5.32 (m, 1H), 4.17 – 4.15 (m, 1H), 4.09 (q, *J* = 6.7 Hz, 1H), 3.98 – 3.90 (m, 1H), 2.34 – 2.32 (m, 3H), 2.26 – 2.19 (m, 2H), 2.13 – 2.09 (m, 3H), 1.74 (d, *J* = 14.6 Hz, 1H), 1.70 – 1.64 (m, 2H), 1.60 – 1.54 (m, 1H), 1.51 – 1.43 (m, 2H), 1.32 – 1.26 (s, 6H), 0.88 (t, *J* = 6.7 Hz, 3H). 13C NMR (151 MHz, CDCl3) δ 177.4, 135.2, 132.9, 129.5, 129.2, 77.4, 73.2, 72.2, 55.2, 50.0, 42.7, 36.8, 33.0, 31.7, 26.3, 25.2, 25.15, 24.5, 22.6, 14.0. HRMS (ESI) Calcd for C20H33O5 [M-H]–: 353.2333, found: 353.2337. [α]: +23.5 (*c* = 1.0, THF). 1H NMR, 13C NMR data and optical rotation were consistent with those reported in literatures22-26 (lit.23 [α] = + 23.27, *c* = 0.47, THF; lit.22 [α] = + 23.5, *c* = 1.00, THF; lit.24 [α] = + 24.9, *c* = 0.57, THF; lit.25 [α] = + 23.8, *c* = 1.00, THF; lit.25 [α]= + 23.5, *c* = 1.00, THF).

Using the same procedure as that used for preparing **15**, in argon-filled glovebox, compound **12** (32 mg, 0.188 mmol), **29** (610 mg, 3.76 mmol) and Hoveyda-Grubbs 2nd catalyst (23.5 mg, 0.038 mmol) were dissolved in degassed DCM (1 mL) in three flasks, respectively. The solution of **12** was heat to 40 oC. The solution of **29** and Hoveyda-Grubbs 2nd catalyst were added every 5 min into the solution of **12** *via* respective syringe at the same time (5 portions, 0.2 mL each time). The mixture was stirred for 5 min after complete adding of **29** and Hoveyda-Grubbs 2nd catalyst. The solvent was removed under reduced pressure. The resulted crude residue was purified by silica gel column chromatography (1:1 = PE:EA) to obtain **S18** (as an approximately 2:1 mixture of diastereoisomers, 35 mg, 0.116 mmol, 62%) as light black oil. Data for **S18**: R*f* = 0.47 (ethyl acetate). 1H NMR (600 MHz, Methanol-*d*4) δ 7.25 (t, *J* = 7.6 Hz, 5.73H), 7.19 (d, *J* = 7.3 Hz, 5.80H), 7.14 (t, *J* = 7.3 Hz, 2.86H), 5.66 – 5.52 (m, 8H), 5.50 – 5.47 (m, 1.20H), 4.53 (td, *J* = 7.0, 4.2 Hz, 2H), 4.45 (td, *J* = 7.5, 5.2 Hz, 1H), 4.02 (q, *J* = 6.7, 6.3 Hz, 3H), 3.87 – 3.79 (m, 2H), 3.76 (td, *J* = 9.3, 7.0 Hz, 1H), 2.71 – 2.61 (m, 7.10H), 2.49 – 2.31 (m, 6.14.14H), 2.14 – 2.06 (m, 3H), 1.99 – 1.94 (m, 4H), 1.93 – 1.81 (m, 5H), 1.81 – 1.73 (m, 3H), 1.65 – 1.60 (m, 2H). 13C NMR (151 MHz, Methanol-*d*4) δ 143.5, 143.4, 135.8, 135.6, 133.7, 132.9, 129.5, 129.4, 126.8, 101.7, 100.8, 82.7, 80.7, 78.6, 78.2, 73.0, 72.9, 57.8, 57.0, 47.0, 46.6, 43.5, 41.3, 40.3, 40.2, 40.1, 39.0, 32.9, 32.8. HRMS (ESI) Calcd for C18H24O4Na [M+Na]+: 327.1567, found: 327.1566. ([α]: –2.7, *c* = 0.22, CH2Cl2).

To a solution of **S18** (27 mg, 0.089 mmol) in ethanol (2.5 mL) at room temperature was added Pd/C (5%, 5 mg) and 1M NaOH (47 μL) aqueous solution. The flask was changed air to hydrogen gas with hydrogen gas balloon (1 atm) and stirred for 3.3 h. Careful monitoring of the reaction by TLC when was carried out. The reaction mixture was instantly quenched with H2O and filtered over a pad of celite once finished then extracted with ethyl acetate (3 × 50 mL). The combined organic layer was removed under reduced pressure to provide a crude reduced product. To a suspension of **39** (311 mg, 0.7 mmol) in anhydrous THF (5 mL) at 0 oC under Ar was added KO*t*Bu (157 mg, 1.4 mmol) in one portion. The orange mixture was stirred for 40 min at the same temperature. A solution of the crude reduced product in anhydrous THF (2.0 ml) was added into the orange mixture dropwise via syringe at 0 oC. The mixture was then warmed to room temperature and stirred for 2 h. The reaction was quenched with H2O (5 ml) and washed with Et2O (10 ml). The aqueous phase was acidized with 1 M HCl (2 ml) and extracted with DCM (5 × 10 ml). The combined organic phases were dried over anhydrous Na2SO4, filtered, and concentrated to give the crude residue. The crude product was purified by silica gel column chromatography (ethyl acetate) to give **S19** (17 mg, 0.045 mmol, 51%) as colorless oil. Data for **S19**: R*f* = 0.51 (20:1 = EA:MeOH). 1H NMR (400 MHz, CDCl3) δ 7.31 – 7.24 (m, 2H), 7.22 – 7.11 (m, 3H), 5.53 – 5.42 (m, 1H), 5.42 – 5.30 (m, 1H), 4.20 – 4.14 (m, 1H), 3.97 – 3.88 (m, 1H), 3.69 (p, *J* = 5.7 Hz, 1H), 2.79 (dt, *J* = 15.2, 7.3 Hz, 1H), 2.64 (dt, *J* = 13.8, 7.9 Hz, 1H), 2.33 (t, *J* = 6.7 Hz, 2H), 2.24 (t, *J* = 7.3 Hz, 2H), 2.13 (q, *J* = 7.2 Hz, 2H), 1.94 – 1.81 (m, 2H), 1.81 – 1.73 (m, 2H), 1.72 – 1.65 (m, 3H), 1.63 – 1.46 (m, 3H), 1.39 – 1.32 (m, 2H). 13C NMR (151 MHz, CDCl3) δ 177.3, 142.1, 129.5, 129.4, 128.4, 125.8, 78.5, 74.4, 71.5, 52.4, 51.7, 42.5, 38.7, 35.2, 33.0, 32.1, 29.0, 26.6, 26.3, 24.6. HRMS (ESI) Calcd for C23H33O5 [M-H]–: 389.2333, found: 389.2333. [α]: +29.3 (*c* = 1.0, MeOH). 1H NMR, 13C NMR data and optical rotation were consistent with those reported in literatures23,27,28 (lit.23 [α] = +30.84, *c* = 0.43, MeOH; lit.28 [α] = +29.7, *c* = 1.0, MeOH; lit.27 [α] = +29.0, *c* = 1.0, MeOH).

To a solution of **S19** (30 mg, 0.077 mmol) in DMF (0.5 mL) was added Cs2CO3 (50 mg, 0.153 mmol) and 2-iodopropane (20 mg, 0.117 mmol). The reaction mixture was stirred at room temperature for 24 h. The reaction was quenched with H2O (10 mL) and extracted with Et2O (3 × 10 mL). The combined organic layer was washed with brine, dried over anhydrous Na2SO4, and filtered. The solvent was removed under reduced pressure to give crude residue. The residue was purified by silica gel column chromatography (1:2 = PE:EA) to give **latanoprost** (20 mg, 0.048 mmol, 62%) as clear colorless oil. Data for **lantanoprost**: R*f* = 0.55 (1:1 = PE:EA). 1H NMR (600 MHz, CDCl3) δ 7.23 – 7.18 (m, 2H), 7.13 – 7.10 (m, 3H), 5.41 – 5.37 (m, 1H), 5.35 – 5.26 (m, 1H), 4.92 (hept, *J* = 6.3 Hz, 1H), 4.09 (br, 1H), 3.87 (br, 1H), 3.59 (dt, *J* = 11.8, 5.8 Hz, 1H), 2.75 – 2.70 (m, 1H), 2.63 – 2.58 (m, 1H), 2.44 (br, 1H), 2.33 – 2.10 (m, 5H), 2.10 – 2.01 (m, 2H), 1.84 – 1.76 (m, 3H), 1.74 – 1.67(m, 2H), 1.65 – 1.58 (m, 3H), 1.57 – 1.51 (m, 2H), 1.48 – 1.42 (m, 1H), 1.33 – 1.24 (m, 2H), 1.15 (d, *J* = 6.3 Hz, 6H). 13C NMR (151 MHz, CDCl3) δ 173.5, 142.1, 129.6, 129.4, 128.4, 125.8, 78.8, 74.7, 71.3, 67.6, 52.8, 51.9, 42.5, 39.0, 35.8, 34.0, 32.1, 29.6, 26.9, 26.6, 24.9, 21.8. HRMS (ESI) Calcd for C26H41O5 [M+H]+: 433.2949, found: 433.2947. [α]: +32.7 (*c* = 0.8, MeCN). (lit.23 [α] = +33.7, *c* = 0.46, MeCN; lit.27 [α] = +33.0, *c* = 1.0, MeCN; lit.28: [α] = +32.0, *c* = 1.0, CHCl3).

Using the same procedure as that used for preparing **15**, in an argon-filled glovebox, compound **12** (40 mg, 0.235 mmol), **32** (267 mg, 1.88 mmol) and Hoveyda-Grubbs 2nd catalyst (29 mg, 0.047 mmol) were dissolved in degassed DCM (1 mL) in three flasks, respectively. The solution of **12** was heat to 40 oC. The solution of **32** and Hoveyda-Grubbs 2nd catalyst were added every 5 min into the solution of **12** *via* respective syringe at the same time (5 portions, 0.2 mL each time). The mixture was stirred for 10 min after complete adding of **32** and Hoveyda-Grubbs 2nd catalyst. The solvent was removed under reduced pressure to give crude residue. The crude residue was purified by silica gel column chromatography (1:1 = PE:EA) to obtain **S20** (as an approximately 1.17:1 mixture of diastereoisomers, 50 mg, 0.176 mmol, 75%) as light black oil. Data for **S20**: R*f* = 0.42 (ethyl acetate). 1H NMR (600 MHz, CDCl3) δ 5.66 – 5.57 (m, 3.18H), 5.53 (d, *J* = 5.5 Hz, 1H), 5.45 – 5.40 (m, 1.88H), 4.62 – 4.59 (m, 1.17H), 4.57 – 4.54 (m, 1H), 3.86 – 3.81 (m, 2.31H), 2.71 (q, *J* = 7.5 Hz, 1H), 2.44 – 2.32 (m, 5H), 2.22 – 2.08 (m, 2.35H), 2.08 – 1.91 (m, 4.47H), 1.75 – 1.70 (m, 1.35H), 1.54 – 1.43 (m, 4.29H), 1.30 – 1.24 (m, 17.54H), 0.87 (t, *J* = 7.0 Hz, 6.54H). 13C NMR (151 MHz, CDCl3) δ 139.2, 138.5, 128.7, 127.8, 100.8, 99.7, 83.7, 80.6, 78.5, 78.2, 72.8, 72.78, 57.1, 56.9, 46.7, 45.7, 42.8, 42.5, 39.7, 39.1, 39.0, 32.23, 32.2, 27.1, 23.8, 22.6, 14.0. HRMS (ESI) Calcd for C16H27O3 [M-H2O+H]+: 267.1955, found: 267.1954.

To a suspension of **39** (750 mg, 1.69 mmol) in anhydrous THF (10 mL) at 0 oC under Ar was added KO*t*Bu (379 mg, 3.38 mmol) in one portion. The orange mixture was stirred for 40 min at the same temperature. A solution of **S20** (60 mg, 0.35 mmol) in anhydrous THF (5.0 ml) was added dropwise via syringe at 0 oC. The mixture was warmed to room temperature and stirred for 2 h. The reaction was quenched with H2O (20 ml) and washed with Et2O (10 ml). The aqueous phase was made acidic with 1 M HCl (4 ml) and extracted with DCM (5 × 10 ml). The combined organic phases were dried over anhydrous Na2SO4, filtered and concentrated to afford the crude residue. The crude product was purified by silica gel column chromatography (ethyl acetate) to give **carboprost** (56 mg, 0.143 mmol, 72%) as colorless oil. Data for **carboprost**: R*f* = 0.54 (20:1 = EA:MeOH). 1H NMR (600 MHz, CDCl3) δ 5.62 (d, *J* = 15.5 Hz, 1H), 5.49 – 5.41 (m, 2H), 5.34 (q, *J* = 7.6 Hz, 1H), 4.72 (br, 4H), 4.22 – 4.10 (m, 1H), 3.98– 3.90 (m, 1H), 2.32 – 2.30 (m, 3H), 2.24 – 2.06 (m, 5H), 1.75 (d, *J* = 14.1 Hz, 1H), 1.71 – 1.60 (m, 2H), 1.56 – 1.48 (m, 2H), 1.46 – 1.43 (m, 1H), 1.35 – 1.20 (m, 9H), 0.87 (t, *J* = 6.9 Hz, 3H). 13C NMR (151 MHz, CDCl3) δ 177.2, 138.8, 129.5, 129.2, 128.8, 76.8, 73.4, 72.6, 55.5, 50.7, HRMS (ESI) Calcd for C21H36O5 Na [M+Na]+: 391.2455, found: 391.2452. [α]: +22.7 (*c* = 1.0, CHCl3).

Using the same procedure as that used for preparing **15**, in an argon-filled glovebox, compound **12** (40 mg, 0.235 mmol), **37** (546 mg, 2.35 mmol) and Hoveyda-Grubbs 2nd catalyst (29 mg, 0.047 mmol) were dissolved in degassed DCM (1 mL) in three flasks, respectively. The solution of **12** was heat to 40 oC. The solution of **37** and Hoveyda-Grubbs 2nd catalyst were added every 5 min into the solution of **12** *via* respective syringe at the same time (5 portions, 0.2 mL each time). The solvent was removed instantly under reduced pressure after complete addition of **37** and Hoveyda-Grubbs 2nd catalyst to afford crude residue. The crude residue was purified by silica gel column chromatography (1:1 = PE:EA) to obtain **S21** (as an approximately 1.2:1 mixture of diastereoisomers, 43 mg, 0.162 mmol, 69%) as light black oil. Data for **S21**: R*f* = 0.42 (ethyl acetate). 1H NMR (600 MHz, CDCl3) δ 7.15 (t, *J* = 8.1 Hz, 1H), 6.93 – 6.85 (m, 2H), 6.76 (d, *J* = 8.3 Hz, 1H), 5.69 – 5.49 (m, 3H), 5.30 (br, 0.38H), 4.69 (br, 1H), 4.57 – 4.41 (m, 2H), 4.31 – 4.04 (m, 1.53H), 3.90 – 3.75 (m, 3H), 3.27 (br, 0.52H), 2.72 (q, *J* = 7.6 Hz, 0.45H), 2.42 – 2.26 (m, 2H), 2.14 – 2.02 (m, 1H), 2.00 – 1.84 (m, 2H), 1.69 – 1.66 (m, 0.57H). 13C NMR (151 MHz, CDCl3) δ 159.22, 159.2, 135.3, 134.7, 134.5, 130.3, 130.2, 129.8, 121.23, 121.2, 115.1, 115.0, 113.1, 100.5, 99.5, 82.8, 80.0, 77.6, 77.5, 71.8, 71.7, 70.8, 70.7, 56.8, 56.4, 46.0, 45.3, 42.3, 39.6, 38.7, 38.3. HRMS (ESI) Calcd for C17H20ClO4 [M-H2O+H]+ 323.1045, found: 323.1043. [α]: –15.0 (*c* = 1.0, DCM).

To a suspension of **39** (785 mg, 1.77 mmol) in anhydrous THF (10 mL) at 0 oC under Ar was added KO*t*Bu (397 mg, 3.54 mmol) in one portion. The orange mixture was stirred for 40 min at the same temperature. A solution of **S21** (80 mg, 0.22 mmol) in anhydrous THF (5.0 ml) was added dropwise via syringe at 0 oC. The mixture was warmed to room temperature and stirred for 2 h. After complete consumption of the starting material, the reaction was quenched with H2O (10 ml) and washed with Et2O (10 ml). The aqueous phase was acidized with 1 M HCl (4 ml) and extracted with DCM (5 × 10 ml). The combined organic phase was dried over anhydrous Na2SO4, filtered, and concentrated to give the crude residue. The crude product was purified by silica gel column chromatography (ethyl acetate) to give **cloprostenol** (65 mg, 0.152 mmol, 69%) as colorless oil. Data for **cloprostenol**: R*f* = 0.55 (20:1 = EA:MeOH). 1H NMR (600 MHz, CDCl3) δ 7.17 (t, *J* = 8.1 Hz, 1H), 6.92 (d, *J* = 7.9 Hz, 1H), 6.90 (t, *J* = 2.1 Hz, 1H), 6.79 (dd, *J* = 8.3, 2.2 Hz, 1H), 5.73 – 5.62 (m, 2H), 5.47 – 5.40 (m, 1H), 5.38 – 5.30 (m, 1H), 4.56 – 4.51 (m, 1H), 4.17 – 4.15 (m, 1H), 3.97 – 3.88 (m, 3H), 2.39– 2.35 (m, 1H), 2.31 (t, *J* = 6.6 Hz, 2H), 2.27– 2.22 (m, 1H), 2.20– 2.16 (m, 1H), 2.13 – 2.07 (m, 3H), 1.75 (dd, *J* = 14.8, 3.1 Hz, 1H), 1.68 – 1.56 (m, 2H), 1.51 – 1.45 (m, 1H). 13C NMR (151 MHz, CDCl3) δ 177.3, 159.2, 135.2, 134.9, 130.3, 129.7, 129.0, 121.3, 115.1, 113.1, 77.5, 72.5, 71.8, 70.8, 55.5, 50.2, 42.8, 32.8, 26.2, 25.2, 24.4. HRMS (ESI) Calcd for C22H28ClO6 [M-H]–: 423.1580, found: 423.1580. [α]: +18.8 (*c* = 1.0, CHCl3). 1H NMR, 13C NMR data and optical rotation were consistent with those reported in literatures29,30 (lit.29: [α] 20 546 = +27, *c* = 1.0, CHCl3; lit.30 [α] = +26, *c* = 1.5, CHCl3).

Using the same procedure as that used for preparing **15**, in an argon-filled glovebox, compound **12** (40 mg, 0.235 mmol), **38** (546 mg, 2.35 mmol) and Hoveyda-Grubbs 2nd catalyst (29 mg, 0.047 mmol) were dissolved in degassed DCM (1 mL) in three flasks, respectively. The solution of **12** was heat to 40 oC. The solution of **38** and Hoveyda-Grubbs 2nd catalyst were added every 5 min into the solution of **12** *via* respective syringe at the same time (5 portions, 0.2 mL each time), with careful monitoring of the reaction by TLC when was carried out. The solvent was removed instantly under reduced pressure after complete adding of **38** and Hoveyda-Grubbs 2nd catalyst to afford crude residue. The crude residue was purified by silica gel column chromatography (1:1 = PE:EA) to obtain **S22** (as an approximately 1.2:1 mixture of diastereoisomers, 54 mg, 0.145 mmol, 62%) as a colorless oil. Data for **S22**: R*f* = 0.42 (ethyl acetate). 1H NMR (600 MHz, CDCl3) δ 7.34 (t, *J* = 8.0 Hz, 1H), 7.18 (d, *J* = 7.6 Hz, 1H), 7.11 (s, 1H), 7.05 (d, *J* = 8.2 Hz, 1H), 5.73 – 5.47 (m, 3H), 5.20 (br, 0.44H), 4.81 – 4.35 (m, 3H), 4.15 – 4.00 (m, 1.41H), 3.97 – 3.80 (m, 3H), 3.02 (br, 0.64H), 2.75 (q, *J* = 7.8 Hz, 0.49H), 2.45 – 2.28 (m, 3H), 2.21 – 2.04 (m, 1H), 2.02 – 1.83 (m, 2H), 1.72 – 1.67 (m, 1H). 13C NMR (151 MHz, CDCl3) δ 158.6, 158.2, 135.5, 134.7, 131.8 (q, *J* = 31.8 Hz), 130.2, 130.0, 129.8, 123.9 (q, *J* = 272.5 Hz), 118.1, 117.8 (m), 111.5 (m), 100.6, 99.6, 83.0, 80.1, 77.7, 77.6, 71.8, 71.79, 70.9, 70.8, 57.0, 56.5, 46.1, 45.4, 42.4, 39.6, 38.8, 38.3. 19F NMR (565 MHz, CDCl3) δ -62.6. HRMS (ESI) Calcd for C18H20F3O4 [M-H2O+H]+: 357.1308, found: 357.1304. [α]: –13.1 (*c* = 1.0, DCM ).

To a suspension of **39** (664 mg, 1.50 mmol) in anhydrous THF (10 mL) at 0 oC under Ar was added KO*t*Bu (336 mg, 2.99 mmol) in one portion. The orange mixture was stirred for 40 min at the same temperature. A solution of **S22** (70 mg, 0.187 mmol) in anhydrous THF (5.0 ml) was added dropwise via syringe at 0 oC. The mixture was warmed to room temperature and stirred for 2 h. The reaction was quenched with H2O (10 ml) and washed with Et2O (10 ml). The aqueous phase was made acidic with 1 M HCl (4 ml) and extracted with DCM (5 × 10 ml). The combined organic phases were dried over anhydrous Na2SO4, filtered, and concentrated to give the crude residue. The crude product was purified by silica gel column chromatography (ethyl acetate) to give **fluprostenol** (75 mg, 0.151 mmol, 81%) as colorless oil.

**I. Scalable synthetic pathway for preparing fluprostenol**

In an argon-filled glovebox, compound **20** (2.0 g, 9.34 mmol), **38** (6.5 g, 28 mmol) and Hoveyda-Grubbs 2nd catalyst (407 mg, 0.65 mmol) were dissolved in degassed DCM (10 mL) in three flasks, respectively. The solution of **20** was heat to 40 oC. The solution of **38** were added every 5 min into the solution of **20** *via* syringe (10 portions, 1 mL each time) and Hoveyda-Grubbs 2nd catalyst were added every 10 min into the solution of **20** *via* syringe at the same time (5 portions, 2 mL each time). The mixture was stirred for 10 min after complete adding of **38** and Hoveyda-Grubbs 2nd catalyst. The solvent was removed under reduced pressure to give crude residue. The crude residue was purified by silica gel column chromatography (1:1 = PE:EA) to recover starting material **20** (256 mg, 1.2 mmol) and obtain **41** as light black oil (3.16 g, 7.57 mmol, 81%, 93% (brsm.)) and. Data for **41**: R*f* = 0.42 (ethyl acetate). 1H NMR (600 MHz, CDCl3) δ 7.38 (t, *J* = 8.0 Hz, 1H), 7.21 (d, *J* = 7.6 Hz, 1H), 7.14 (s, 1H), 7.08 (d, *J* = 8.2 Hz, 1H), 5.72 – 5.60 (m, 2H), 4.88 (t, *J* = 3.8 Hz, 1H), 4.57 – 4.43 (m, 1H), 4.22 (s, 1H), 4.03 – 3.93 (m, 4H), 3.89 – 3.83 (m, 3H), 3.15 (br, 3H), 2.36 – 2.31 (m, 2H), 1.87 – 1.82 (m, 2H), 1.75 – 1.70 (m, *J* = 15.5, 8.0 Hz, 2H). 13C NMR (151 MHz, CDCl3) δ 158.6, 135.0, 131.89 (q, *J* = 32.4 Hz), 130.3, 130.0, 123.87 (q, *J* = 272.3 Hz), 118.0, 117.8 (q, *J* = 3.7 Hz), 111.6 (q, *J* = 3.1 Hz), 103.7, 77.1, 72.0, 72.0, 70.8, 65.2, 64.6, 56.0, 44.9, 41.8, 31.1. 19F NMR (376 MHz, CDCl3) δ -62.68. HRMS (ESI) Calcd for C20H25F3O6Na [M+Na]+: 441.1495, found: 441.1492. [α]: –10.8 (*c* = 1.0, CHCl3).


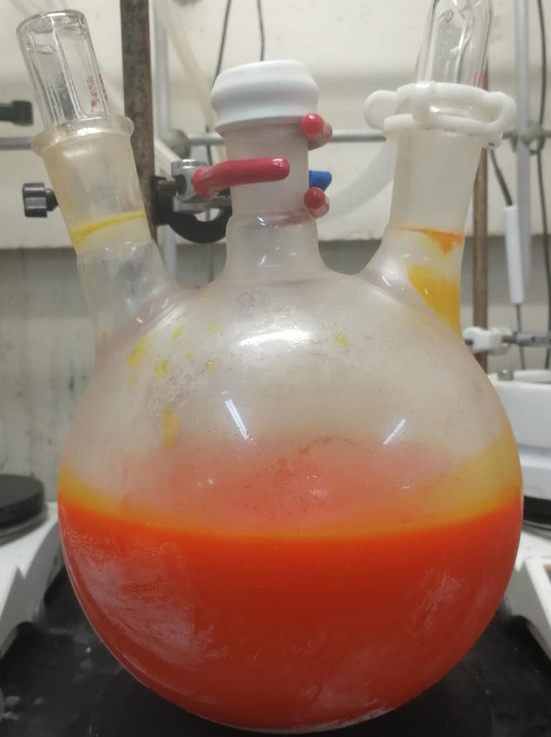

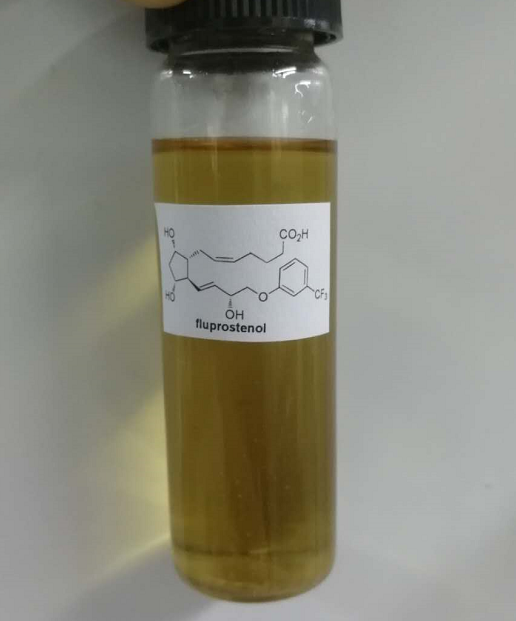


Procedure on a 20-gram scale for preparing **fluprostenol** from **41**: To a solution of **41** (26 g, 62.2 mmol) in THF (300 mL) was added 1 N HCl (300 mL). The mixture was stirred at room temperature until complete consumption of the starting material. The reaction was quenched with saturated aqueous NaHCO3 (300 mL) and extracted with ethyl acetate (3 × 100 mL). The combined organic layer was washed with brine, dried over anhydrous Na2SO4, and filtered. The solvent was removed under reduced pressure to give the crude hemiacetal product. The crude product was used directly without purification. To a suspension of **39** (220 g, 498 mmol) in anhydrous THF (900 mL) at 0 oC under Ar was added KO*t*Bu (111 g, 995 mmol) in one portion. The orange mixture was stirred for 40 min at the same temperature. A solution of the crude hemiacetal product in anhydrous THF (100 ml) was added dropwise via syringe at 0 oC. The mixture was warmed to room temperature and stirred for 2 h. The reaction was quenched with H2O (250 ml) and washed with Et2O (250 ml). The aqueous phase was made acidic with 2 M HCl (500 ml) and extracted with DCM (5 × 10 ml). The combined organic phases were dried over anhydrous Na2SO4, filtered, and concentrated to give the crude residue. The crude product was purified by silica gel column chromatography (ethyl acetate) to give **fluprostenol** (23.1 g, 50.3 mmol, 81%) as light brown oil. Data for **fluprostenol**: R*f* = 0.53 (20:1 = EA:methanol). 1H NMR (600 MHz, CDCl3) δ 7.34 (t, *J* = 7.7 Hz, 1H), 7.17 (d, *J* = 7.6 Hz, 1H), 7.11 (s, 1H), 7.05 (d, *J* = 8.0 Hz, 1H), 5.68 – 5.65 (m, 2H), 5.43 – 5.37 (m, 1H), 5.32 – 5.26 (m, 1H), 4.56 – 4.46 (m, 1H), 4.17 – 4.10 (m, 1H), 4.04 – 3.87 (m, 3H), 2.36 (s, 1H), 2.26 (t, *J* = 6.7 Hz, 3H), 2.21 – 2.15 (m, 1H), 2.12 – 2.00 (m, 3H), 1.71 (d, *J* = 13.5 Hz, 1H), 1.67 – 1.56 (m, 2H), 1.50 – 1.42 (m, 1H). 13C NMR (151 MHz, CDCl3) δ 177.6, 158.6, 135.4, 131.8 (q, *J* = 32.2 Hz), 130.1, 130.0, 129.5, 129.0, 123.9 (q, *J* = 272.4 Hz), 118.0, 117.7 (q, *J* = 4.2 Hz), 111.5 (q, *J* = 4.3 Hz), 77.3, 72.3, 71.7, 71.0, 55.2, 49.8, 42.6, 32.9, 26.2, 25.1, 24.3. 19F NMR (565 MHz, CDCl3) δ -62.6. HRMS (ESI) Calcd for C23H29F3O6Na [M+Na]+: 481.1808, found: 481.1807. [α]: +19.2 (*c* = 1.0, CHCl3). 1H NMR, 13C NMR data and optical rotation were consistent with those reported in literatures31 (lit.31 [α] = +21.1, *c* = 1.0, CHCl3).

To a solution of **fluprostenol** (**42**)(60 mg, 0.131 mmol) in DMF (1 mL) was added Cs2CO3 (64 mg, 0.2 mmol) and 2-iodopropane (45 mg, 0.262 mmol). The reaction mixture was stirred at room temperature for 24 h. The reaction was quenched with H2O (10 mL) and extracted with Et2O (3 × 10 mL). The combined organic layer was washed with brine, dried over anhydrous Na2SO4, and filtered. The solvent was removed under reduced pressure to give crude residue. The crude residue was purified by silica gel column chromatography (1:2 = PE:EA) to give **travoprost** (49 mg, 0.097 mmol, 74%) as colorless oil. Data for **travoprost**: R*f* = 0.53 (1:1 = PE:EA).1H NMR (600 MHz, CDCl3) δ 7.37 (t, *J* = 8.0 Hz, 1H), 7.20 (d, *J* = 7.7 Hz, 1H), 7.13 (s, 1H), 7.07 (dd, *J* = 8.3, 2.0 Hz, 1H), 5.75 – 5.60 (m, 2H), 5.49 – 5.30 (m, 2H), 4.96 (hept, *J* = 6.3 Hz, 1H), 4.56 – 4.44 (m, 1H), 4.15 (t, *J* = 4.2 Hz, 1H), 4.03 – 3.90 (m, 3H), 2.97 (br, 3H), 2.38 (dt, *J* = 13.3, 6.9 Hz, 1H), 2.29 – 2.20 (m, 4H), 2.13 – 2.01 (m, 3H), 1.74 (dd, *J* = 14.8, 3.0 Hz, 1H), 1.67 – 1.60 (m, 2H), 1.53 – 1.48 (m, 1H), 1.19 (d, *J* = 6.3 Hz, 6H). 13C NMR (151 MHz, CDCl3) δ 173.5, 158.7, 135.5, 131.8 (q, *J* = 32.4 Hz), 130.0, 123.0, 129.8, 128.9, 123.9 (q, *J* = 272.1 Hz), 118.0, 117.7 (q, *J* = 4.2 Hz), 111.5 (q, *J* = 3.8 Hz), 77.6, 72.5, 72.0, 70.9, 67.7, 55.6, 50.0, 42.8, 34.0, 26.5, 25.4, 24.8, 21.8, 21.7. 19F NMR (565 MHz, CDCl3) δ -62.7. HRMS (ESI) Calcd for C26H35F3O6Na [M+Na]+: 523.2278, found: 523.2277. [α]: +13.7 (*c* = 1.0, CH2Cl2). 1H NMR, 13C NMR data and optical rotation were consistent with those reported in literatures31,32 (lit.31: [α] = +16.3, *c* = 1.0, DCM; lit.32 [α] = +14.6, *c* = 1.0, DCM).

**J. Formal synthesis of prostaglandin E2**

**Figure S7. Formal synthesis of prostaglandin E2**

To a solution of **16** (200 mg, 0.61 mmol) and Ph2SiH2 (123 mg, 0.67 mmol) in anhydrous and degassed THF (10 mL) under Ar was added Pd(PPh3)4 (14 mg , 0.012 mmol) and anhydrous ZnCl2 (91 mg, 0.67 mmol). The mixture was warmed to 50 oC and was stirred until complete consumption of the starting material. The reaction was then quenched with 1 N HCl (10 mL) and warmed to room temperature. After being stirred for 4 h at the same temperature, the reaction was then quenched with saturated aqueous NaHCO3 (10 mL) and extracted with THF (5 × 10 mL). The combined organic layer was dried over anhydrous Na2SO4, and filtered. The solvent was removed under reduced pressure to afford crude residue which was purified by basic Al2O3 silica gel column chromatography (2:1 = PE:EA to give **43** (82 mg, 0.487 mmol, 79%) as yellow oil. Data for **43**: R*f* = 0.43 (1:1 = PE:EA). 1H NMR (600 MHz, CDCl3) δ 9.73 (s, 1H), 5.76 – ­5.70(m, 1H), 5.25 (s, 1H), 5.22 (d, *J* = 7.9 Hz, 1H), 4.18 (q, *J* = 8.2 Hz, 1H), 2.84 – 2.77 (m, 2H), 2.70 (dd, *J* = 18.7, 5.0 Hz, 1H), 2.56 – 2.45 (m, 2H), 2.41 (dd, *J* = 18.6, 9.4 Hz, 1H), 2.25 (br, 1H). 13C NMR (151 MHz, CDCl3) δ 212.5, 199.3, 136.8, 119.4, 72.0, 55.3, 49.0, 45.2, 41.2. HRMS (ESI) Calcd for C9H12O3Na [M+Na]+: 191.0679, found: 191.0679. [α]: –126.3 (*c* = 1.0, CHCl3).

In an argon-filled glovebox, compound **43** (54 mg, 0.32 mmol), **28** (380 mg, 3.21 mmol) and Hoveyda-Grubbs 2nd catalyst (40 mg, 0.064 mmol) were dissolved in degassed DCM (1 mL) in three flasks, respectively. The solution of **43** was heat to 40 oC. The solution of **28** and Hoveyda-Grubbs 2nd catalyst were added every 5 min into the solution of **43** *via* respective syringe at the same time (5 portions, 0.2 mL each time). The mixture was stirred for 5 min after complete adding of **28** and Hoveyda-Grubbs 2nd catalyst. The solvent was removed under reduced pressure. The resulted crude residue was purified by silica gel column chromatography (1:1 = PE:EA) to obtain **44** (57 mg, 0.21 mmol, 67%) as light black oil. Data for **44**: R*f* = 0.38 (1:1 = PE:EA). 1H NMR (400 MHz, CDCl3) δ 9.71 (s, 1H), 5.66 – 5.45 (m, 2H), 4.13 – 4.03 (m, 2H), 3.09 (br, 1H), 2.78 (dd, *J* = 18.6, 5.3 Hz, 2H), 2.63 (dd, *J* = 18.6, 5.3 Hz, 1H), 2.54 – 2.30 (m, 3H), 1.57 – 1.49 (m, 2H), 1.35 – 1.20 (m, 6H), 0.87 (t, *J* = 6.6 Hz, 3H). 13C NMR (101 MHz, CDCl3) δ 212.7, 199.5, 137.6, 130.8, 72.9, 71.9, 54.4, 49.2, 45.0, 41.2, 37.1, 31.6, 25.1, 22.5, 13.9. HRMS (ESI) Calcd for C15H23O4 [M-H]–: 267.1602, found: 267.1599. [α]: –72.1 (*c* = 1.0, CHCl3).

To a suspension of MePPh3P+Br- (120 mg, 0.34 mmol) in anhydrous THF (5 mL) at 0 oC under Ar was added KO*t*Bu (37 mg, 0.34 mmol) in one portion. The yellow mixture was stirred for 1 h at the room temperature. The reaction mixture was then cooled to 0 oC and added a solution of **44** (30 mg, 0.11 mmol) in anhydrous THF (5.0 ml) *via* syringe. The mixture was warmed to room temperature and stirred until complete consumption of the starting material. The reaction was quenched with aqueous NH4Cl (10 mL). The aqueous phase extracted with Et2O (3 × 10 ml). The combined organic phases were dried over anhydrous Na2SO4, filtered, and concentrated to give the crude residue. The crude product was purified by column (1:1 = PE:EA) to obtain **45** (16 mg, 0.06 mmol, 53%) as colorless oil. Data for **45**: R*f* = 0.42 (1:1 = PE:EA). 1H NMR (600 MHz, CDCl3) δ 5.73 – 5.58 (m, 2H), 5.51 (dd, *J* = 15.2, 8.9 Hz, 1H), 5.08 – 4.95 (m, 2H), 4.12 – 4.04 (m, 2H), 3.56 (br, 1H), 2.77 – 2.70 (m, 1H), 2.46 – 2.37 (m, 2H), 2.32 – 2.25 (m, 1H), 2.19 (dd, *J* = 18.5, 9.8 Hz, 1H), 2.10 (dt, *J* = 11.6, 5.3 Hz, 1H), 1.84 (br, 1H), 1.60 – 1.56 (m, 1H), 1.52 – 1.47 (m, 1H), 1.32 – 1.28 (m, 6H), 0.88 (d, *J* = 5.1 Hz, 3H). 13C NMR (101 MHz, CDCl3) δ 213.8, 137.1, 134.6, 131.4, 117.6, 73.1, 71.9, 54.2, 53.6, 45.9, 37.3, 31.6, 31.5, 25.1, 22.6, 14.0. HRMS (ESI) Calcd for C16H25O3 [M-H]–: 265.1809, found: 265.1806. [α]: –82.1 (*c* = 1.0, CHCl3).1H NMR, 13C NMR data and optical rotation were consistent with those reported in literatures literature33 (lit.33 [α] = –78.3, *c* = 0.59, CHCl3).

# 4. NMR spectra

1H NMR (400 MHz, CDCl3) of compound **11**

13C NMR (101 MHz, CDCl3) of compound **11**

1H NMR (400 MHz, CDCl3) of compound **S3**

13C NMR (101 MHz, CDCl3) of compound **S3**

1H NMR (600 MHz, CDCl3) of compound **18**

13C NMR (151 MHz, CDCl3) of compound **18**

1H NMR (400 MHz, CDCl3) of compound **17**

13C NMR (101 MHz, CDCl3) of compound **17**

1H NMR (600 MHz, CDCl3) of compound **16**

13C NMR (101 MHz, CDCl3) of compound **16**

1H NMR (600 MHz, CDCl3) of compound **12**

13C NMR (151 MHz, CDCl3) of compound **12**

1H NMR (400 MHz, CDCl3) of compound **20**

13C NMR (101 MHz, CDCl3) of compound **20**

1H NMR (600 MHz, CDCl3) of compound **S4**

13C NMR (151 MHz, CDCl3) of compound **S4**

1H NMR (400 MHz, CDCl3) of compound **S5**

13C NMR (101 MHz, CDCl3) of compound **S5**

1H NMR (400 MHz, CDCl3) of compound (±)-**S15**

13C NMR (101 MHz, CDCl3) of compound (±)-**S15**

1H NMR (600 MHz, CDCl3) of compound (±)-**S16**

13C NMR (101 MHz, CDCl3) of compound (±)-**S16**

1H NMR (400 MHz, CDCl3) of compound (±)-**S21**

13C NMR (101 MHz, CDCl3) of compound (±)-**S21**

1H NMR (400 MHz, CDCl3) of compound **S17**

1H NMR (400 MHz, CDCl3) of compound **28**

13C NMR (101 MHz, CDCl3) of compound **28**

1H NMR (400 MHz, CDCl3) of compound **25**

13C NMR (101 MHz, CDCl3) of compound **25**

1H NMR (400 MHz, CDCl3) of compound **27**

13C NMR (101 MHz, CDCl3) of compound **27**

1H NMR (400 MHz, CDCl3) of compound **29**

13C NMR (101 MHz, CDCl3) of compound **29**

1H NMR (600 MHz, CDCl3) of compound **31**

13C NMR (151 MHz, CDCl3) of compound **31**

1H NMR (400 MHz, CDCl3) of compound **32**

13C NMR (101 MHz, CDCl3) of compound **32**

1H NMR (600 MHz, CDCl3) of compound **36**

13C NMR (151 MHz, CDCl3) of compound **36**

19F NMR (565 MHz, CDCl3) of compound **36**

1H NMR (400 MHz, CDCl3) of compound **38**

13C NMR (101 MHz, CDCl3) of compound **38**

19F NMR (565 MHz, CDCl3) of compound **38**

1H NMR (400 MHz, CDCl3) of compound **35**

13C NMR (101 MHz, CDCl3) of compound **35**

1H NMR (400 MHz, CDCl3) of compound **37**

13C NMR (101 MHz, CDCl3) of compound **37**

1H NMR (400 MHz, CDCl3) of compound **15**

13C NMR (101 MHz, CDCl3) of compound **15**

1H NMR (600 MHz, CDCl3) of compound **PGF2α**

13C NMR (151 MHz, CDCl3) of compound **PGF2α**

1H NMR (600 MHz, Methanol-*d*4) of compound **S18**

13C NMR (151 MHz, Methanol-*d*4) of compound **S18**

1H NMR (400 MHz, CDCl3) of compound **S19**

13C NMR (151 MHz, CDCl3) of compound **S19**

1H NMR (600 MHz, CDCl3) of compound **lantanoprost**

13C NMR (151 MHz, CDCl3) of compound **lantanoprost**

1H NMR (600 MHz, CDCl3) of compound **S20**

13C NMR (151 MHz, CDCl3) of compound **S20**

1H NMR (600 MHz, CDCl3) of compound **5**

13C NMR (151 MHz, CDCl3) of compound **5**

1H NMR (600 MHz, CDCl3) of compound **S21**

13C NMR (151 MHz, CDCl3) of compound **S21**

1H NMR (600 MHz, CDCl3) of compound **cloprostenol**

13C NMR (151 MHz, CDCl3) of compound **cloprostenol**

1H NMR (600 MHz, CDCl3) of compound **S22**

13C NMR (151 MHz, CDCl3) of compound **S22**

19F NMR (565 MHz, CDCl3) of compound **S22**

1H NMR (600 MHz, CDCl3) of compound **41**

13C NMR (151 MHz, CDCl3) of compound **41**

19F NMR (376 MHz, CDCl3) of compound **41**

1H NMR (600 MHz, CDCl3) of compound **fluprostenol**

13C NMR (151 MHz, CDCl3) of compound **fluprostenol**

19F NMR (565 MHz, CDCl3) of compound **fluprostenol**

1H NMR (600 MHz, CDCl3) of compound **travoprost**

13C NMR (151 MHz, CDCl3) of compound **travoprost**

19F NMR (565 MHz, CDCl3) of compound **travoprost**

1H NMR (600 MHz, CDCl3) of compound **43**

13C NMR (151 MHz, CDCl3) of compound **43**

1H NMR (400 MHz, CDCl3) of compound **44**

13C NMR (101 MHz, CDCl3) of compound **44**

1H NMR (600 MHz, CDCl3) of compound **45**

13C NMR (101 MHz, CDCl3) of compound **45**

# 5. HPLC spectra

HPLC spectra for compound **S3**


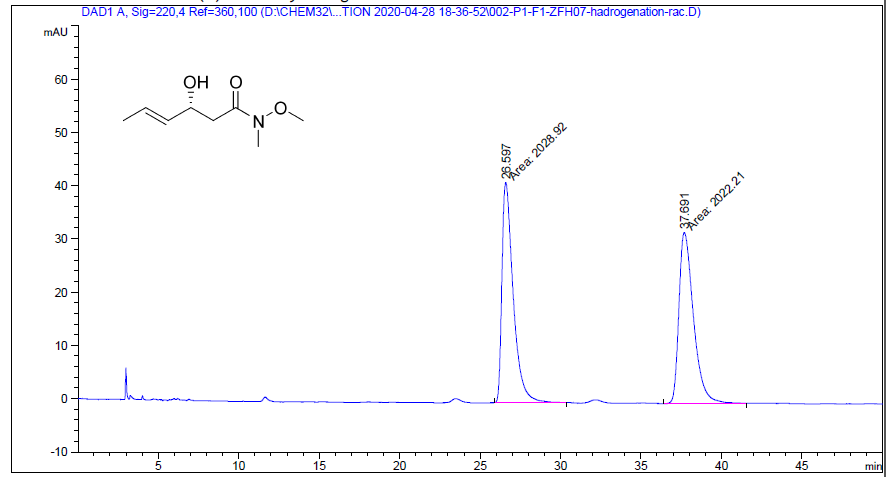


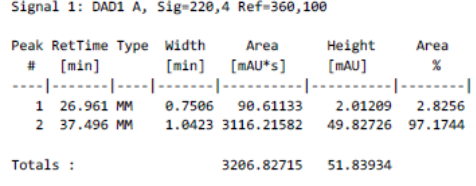


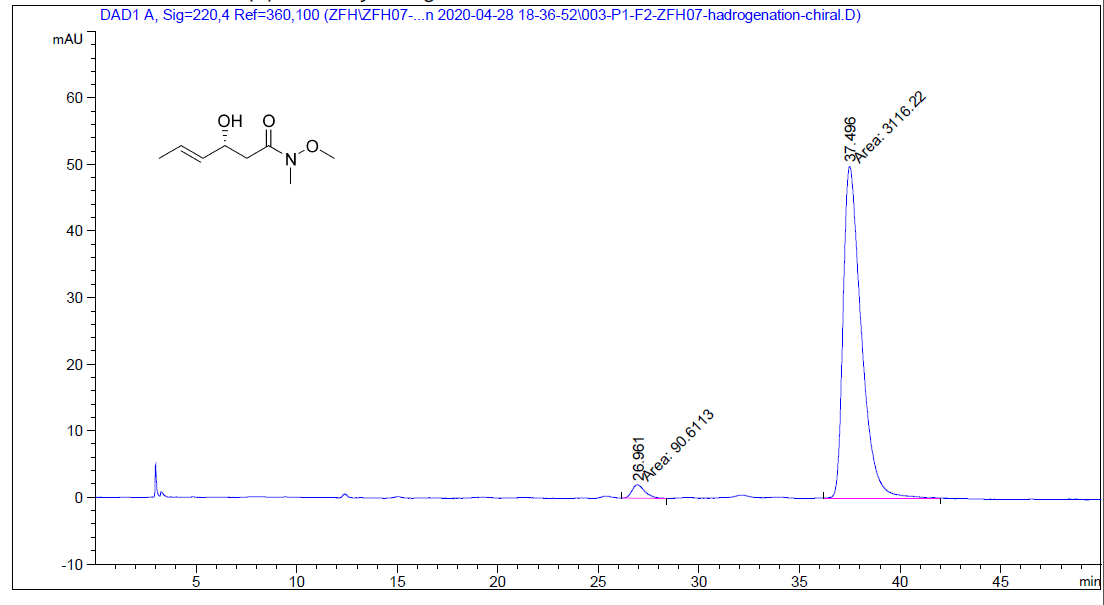


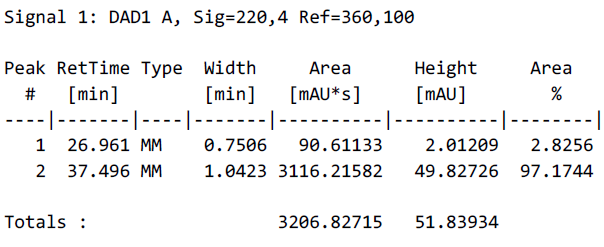


HPLC spectra for compound **S17**


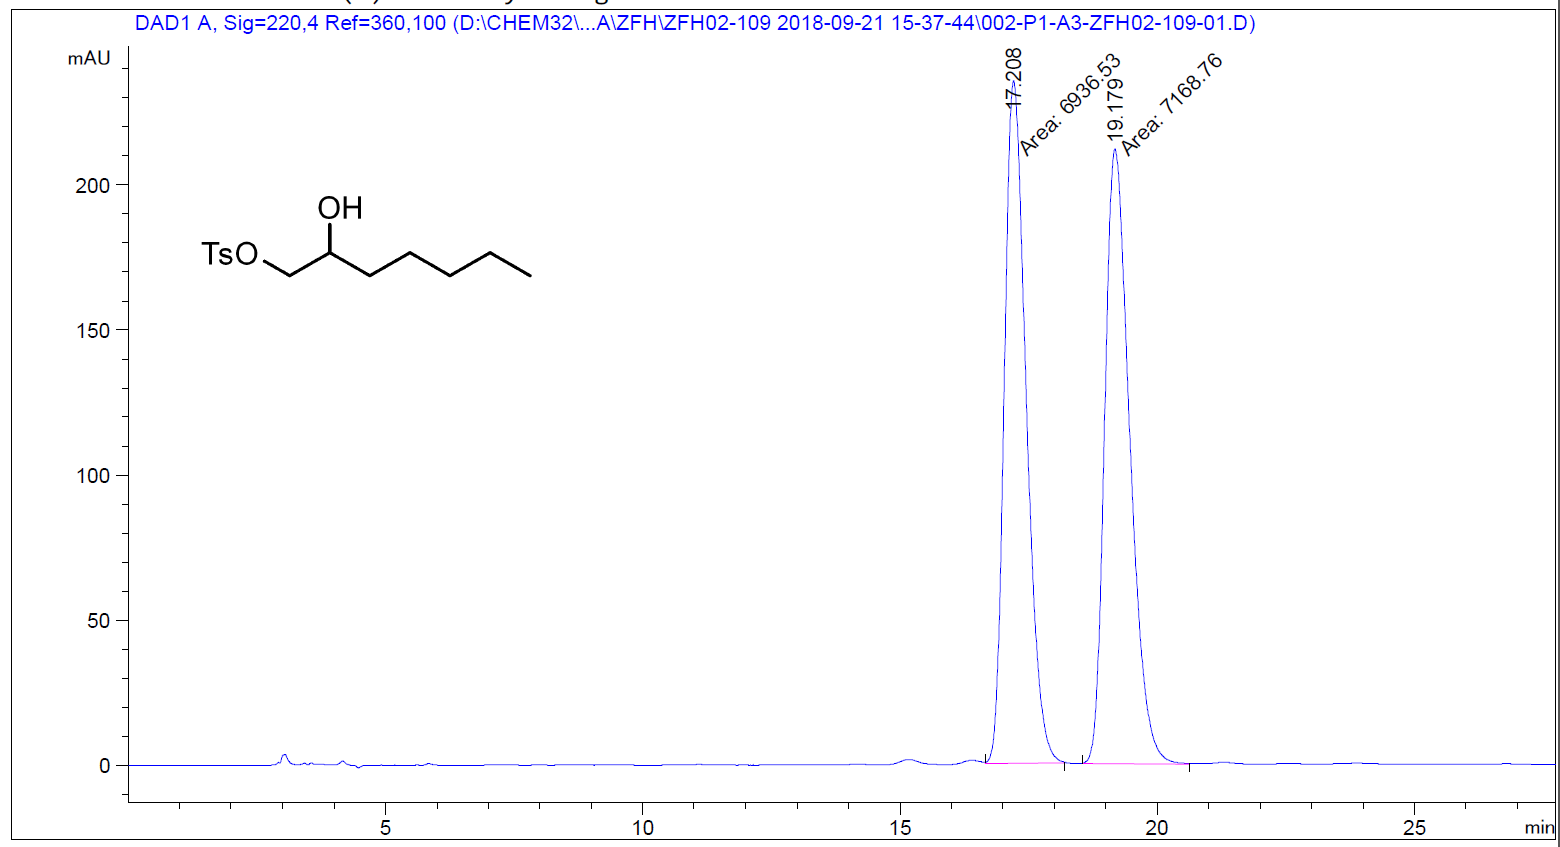


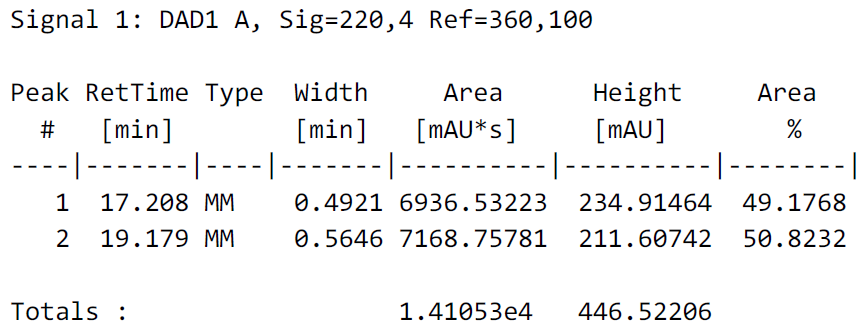


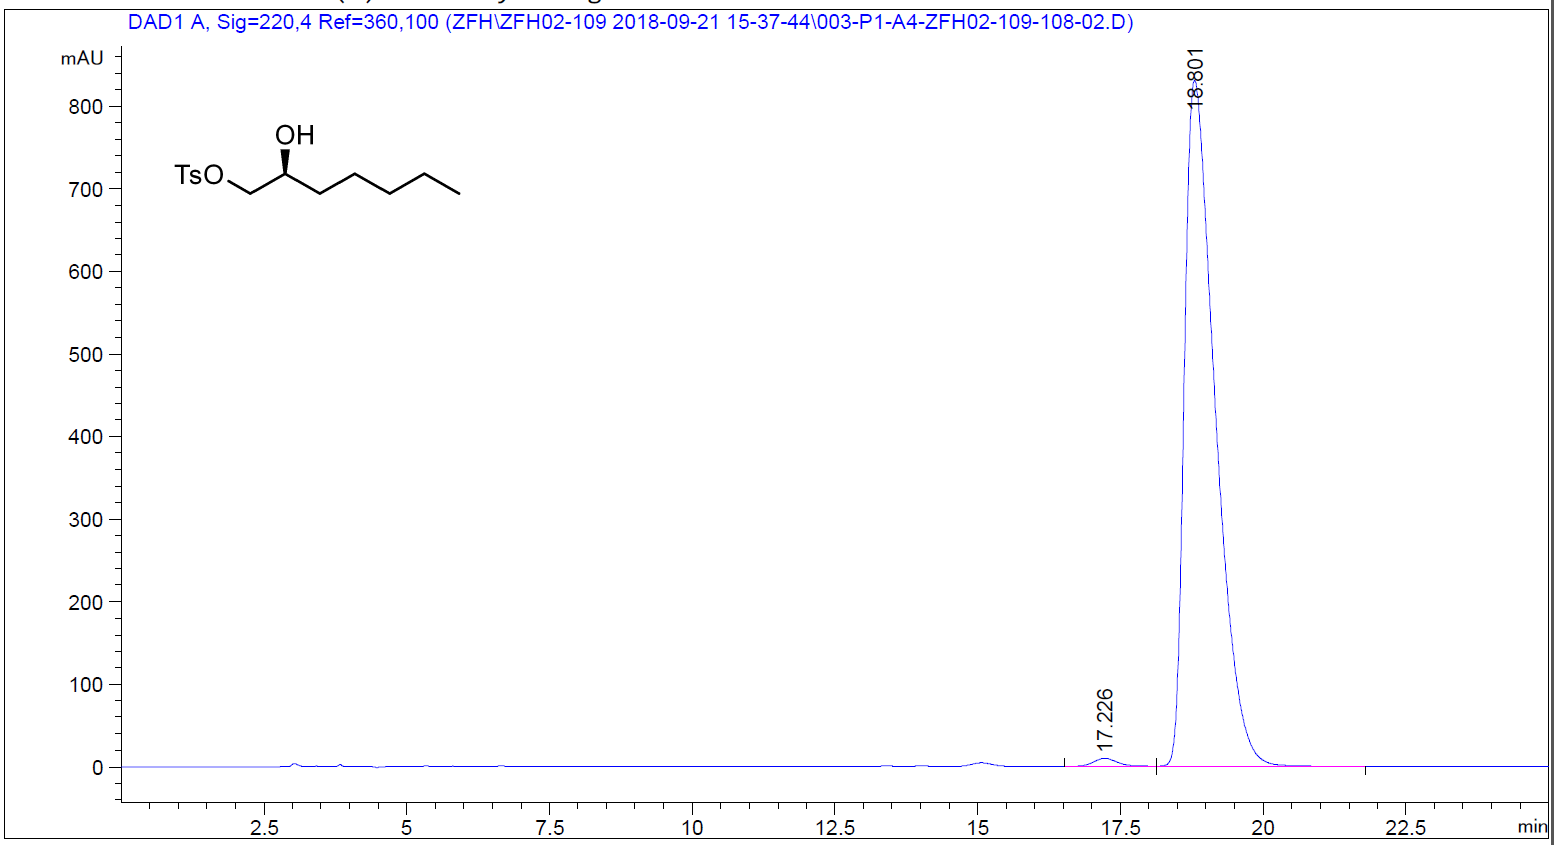


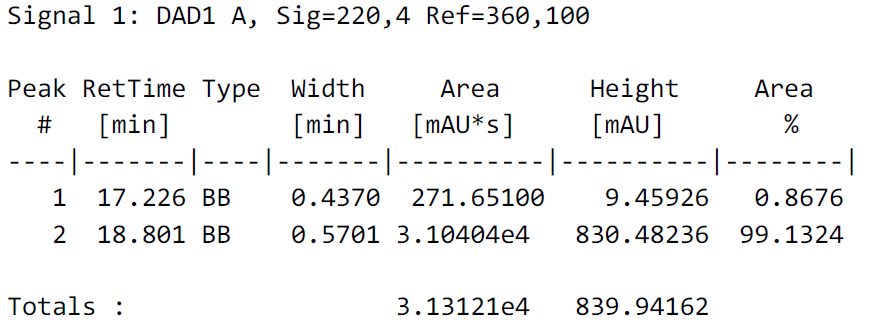


HPLC spectra for compound **25**


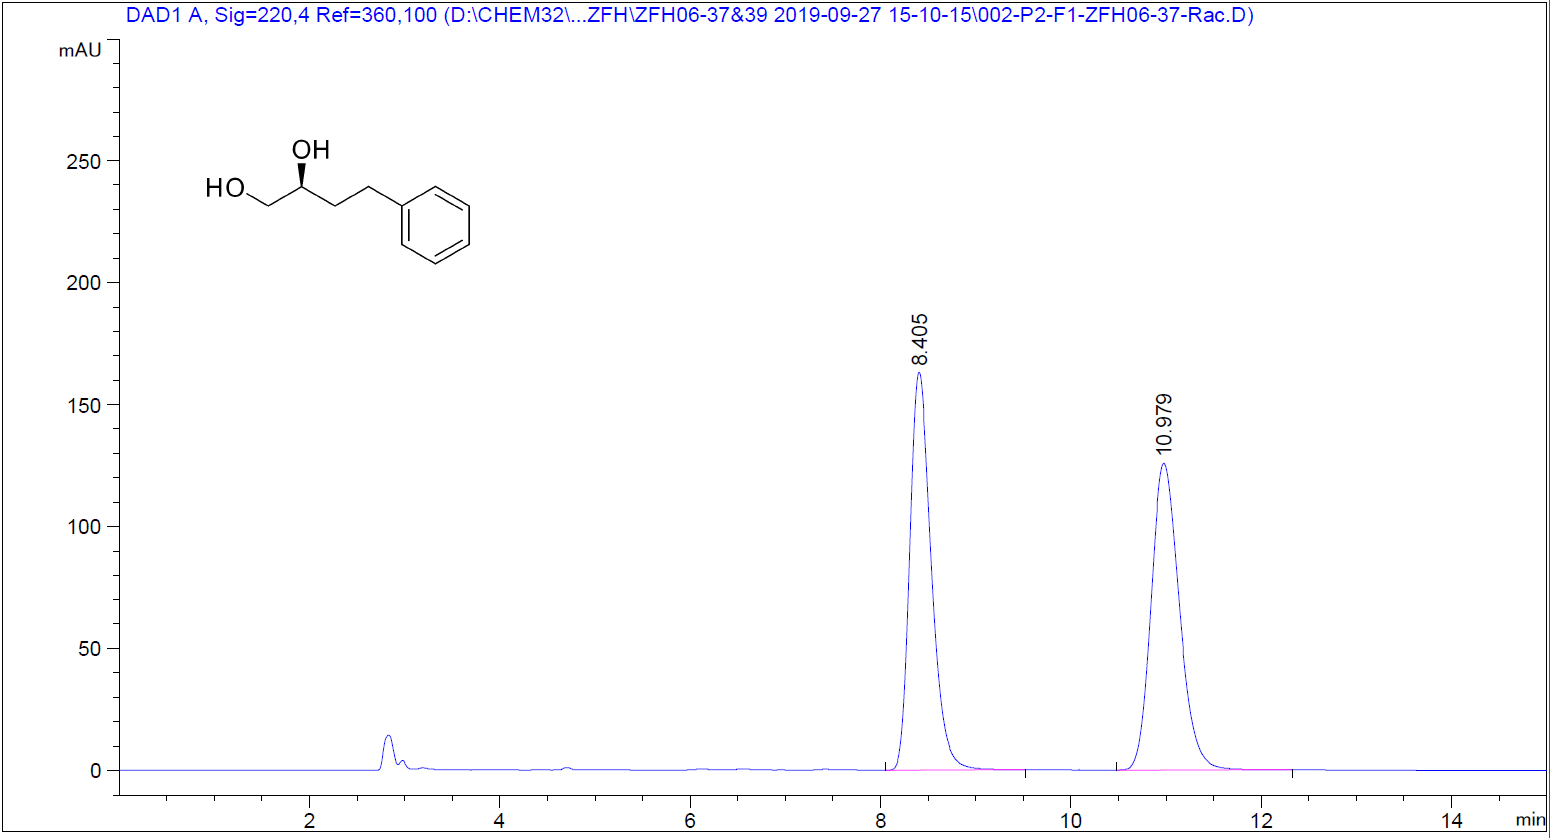


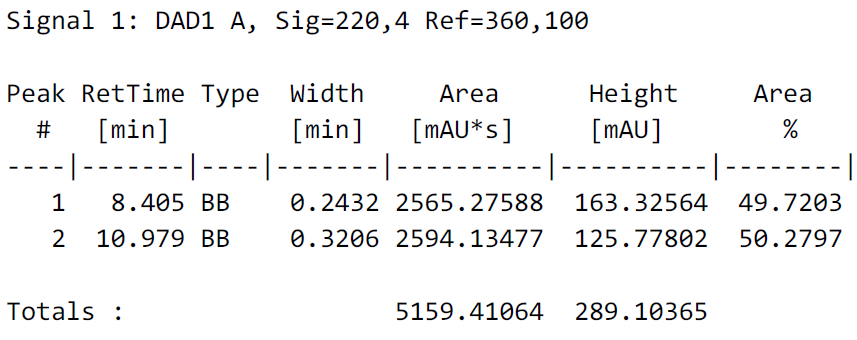


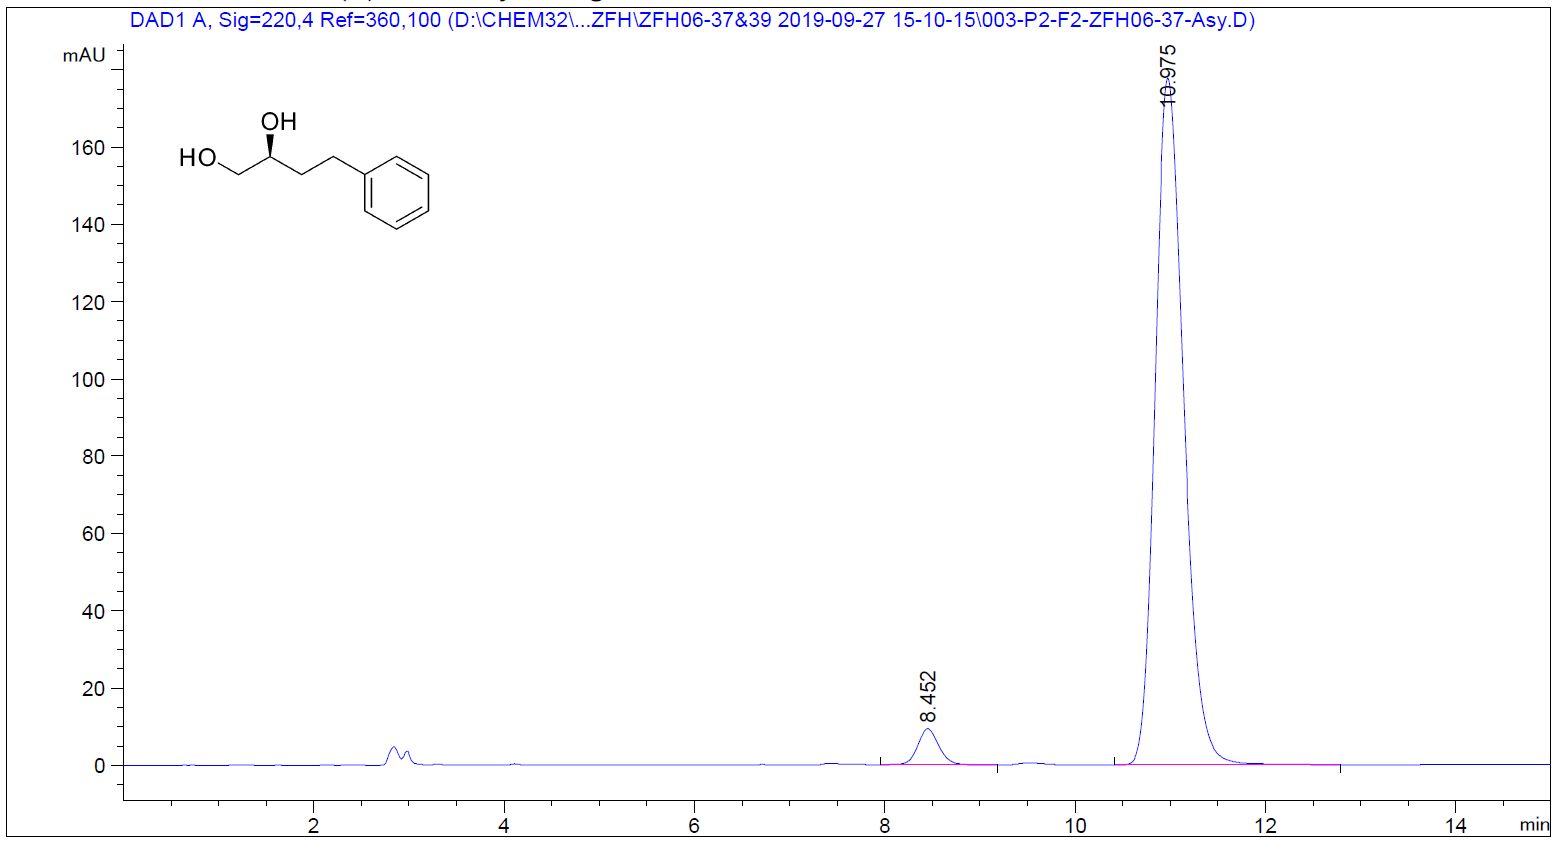


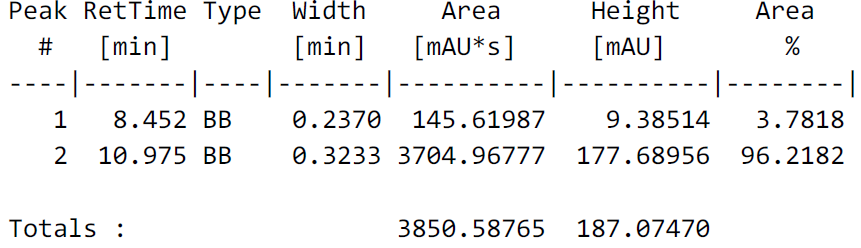


HPLC spectra for compound **16**


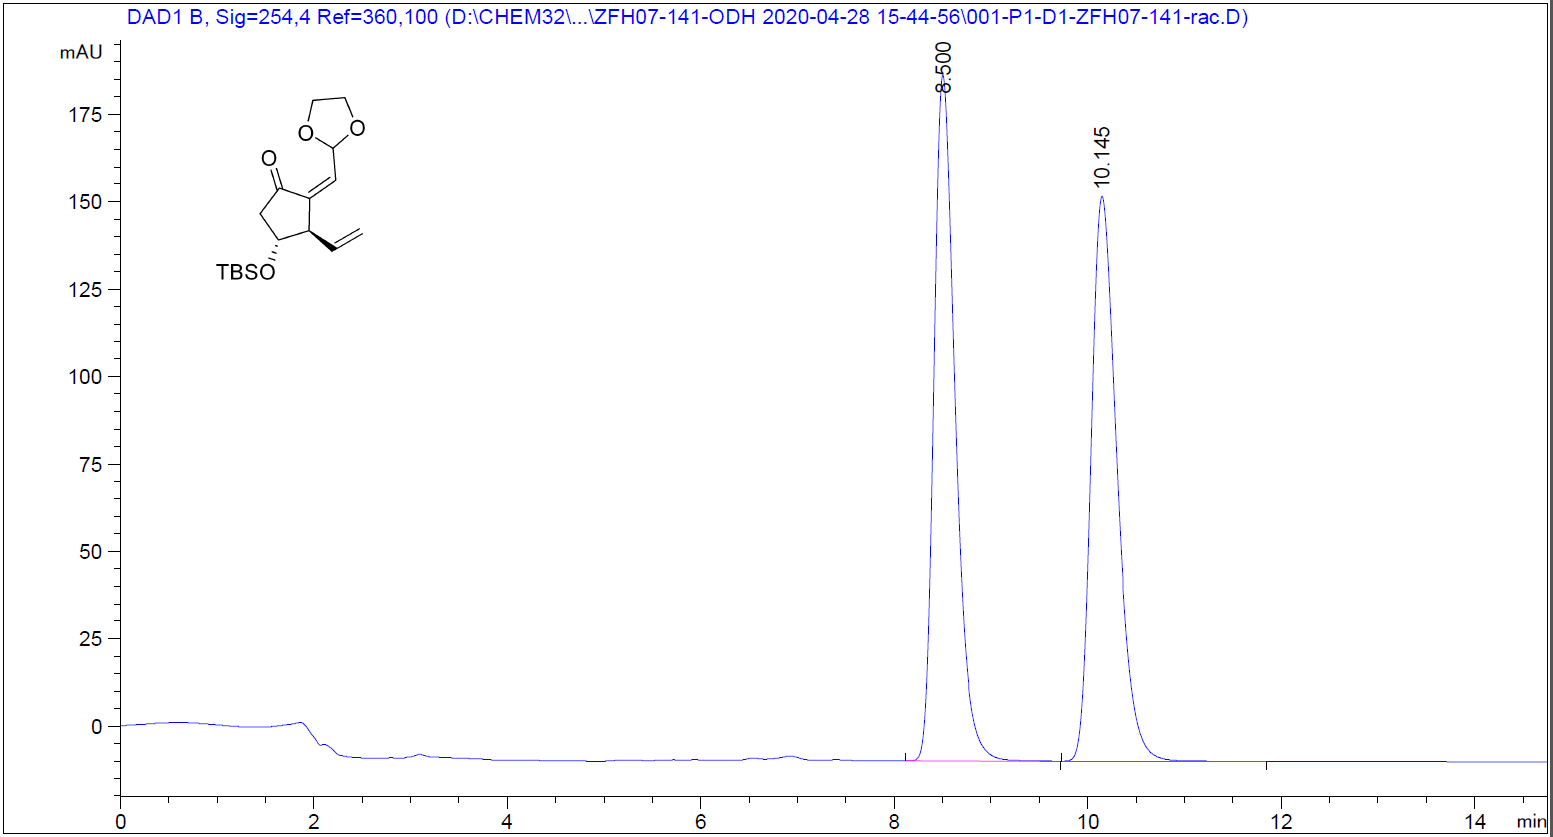


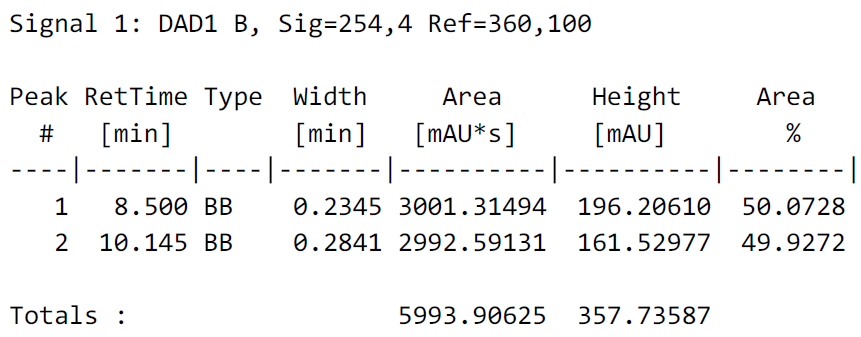


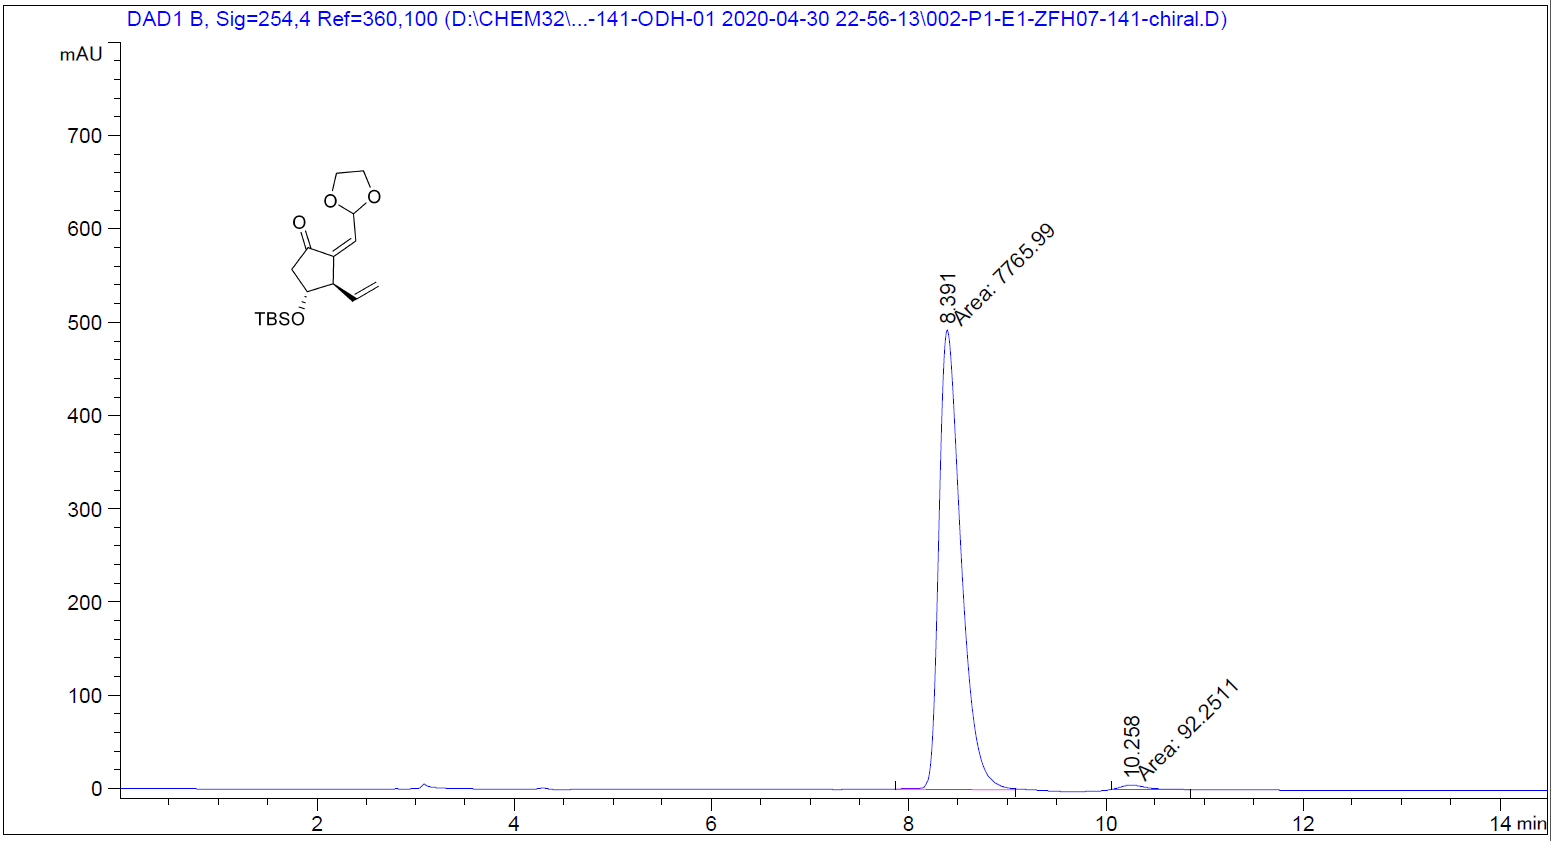


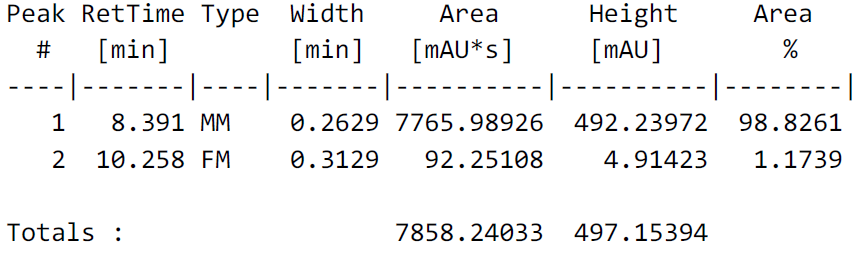


# 6. Crystallographic information

The crystal data of compound **(±)-21** has been deposited in CCDC with number 2013314.

| **Table S1 Crystal data and structure refinement for CCDC 2013314.** | |
| --- | --- |
| Identification code | CCDC 2013314 |
| Empirical formula | C24H26N2O11S |
| Formula weight | 550.53 |
| Temperature/K | 150.0 |
| Crystal system | triclinic |
| Space group | P-1 |
| a/Å | 7.3839(10) |
| b/Å | 11.8686(15) |
| c/Å | 14.4460(19) |
| α/° | 91.348(3) |
| β/° | 92.268(4) |
| γ/° | 93.929(3) |
| Volume/Å3 | 1261.6(3) |
| Z | 2 |
| ρcalcg/cm3 | 1.449 |
| μ/mm‑1 | 1.718 |
| F(000) | 576.0 |
| Crystal size/mm3 | 0.3 × 0.3 × 0.25 |
| Radiation | CuKα (λ = 1.54178) |
| 2Θ range for data collection/° | 9.538 to 144.792 |
| Index ranges | -9 ≤ h ≤ 9, -14 ≤ k ≤ 14, -17 ≤ l ≤ 17 |
| Reflections collected | 34066 |
| Independent reflections | 4901 [Rint = 0.0397, Rsigma = 0.0213] |
| Data/restraints/parameters | 4901/0/345 |
| Goodness-of-fit on F2 | 1.055 |
| Final R indexes [I>=2σ (I)] | R1 = 0.0350, wR2 = 0.0921 |
| Final R indexes [all data] | R1 = 0.0359, wR2 = 0.0928 |
| Largest diff. peak/hole / e Å-3 | 0.26/-0.42 |

| **Table S2. Fractional Atomic Coordinates ( × 104) and Equivalent Isotropic Displacement Parameters (Å2 × 103) for CCDC 1821575.** Ueq is defined as 1/3 of of the trace of the orthogonalised UIJ tensor. | | | | |
| --- | --- | --- | --- | --- |
| **Atom** | ***x*** | ***y*** | ***z*** | **U(eq)** |
| O1 | 2982(2) | 1858.7(15) | 5598.3(6) | 28.8(3) |
| O2 | 6288(2) | 5939.4(14) | 5880.9(6) | 27.1(3) |
| O3 | 8856(2) | 3312.7(15) | 6241.0(6) | 30.2(3) |
| O4 | 2357.2(18) | 2979.6(13) | 6852.6(5) | 22.0(3) |
| C1 | 7740(3) | 2261(2) | 6109.3(8) | 22.7(4) |
| C2 | 8359(3) | 963(2) | 6147.3(8) | 29.9(5) |
| C3 | 7132(3) | -53(2) | 6015.6(9) | 33.1(5) |
| C4 | 5279(3) | 166(2) | 5838.5(9) | 31.8(5) |
| C5 | 4732(3) | 1463(2) | 5786.6(8) | 24.2(4) |
| C6 | 5908(3) | 2502.0(19) | 5918.5(7) | 19.9(4) |
| C7 | 4855(3) | 3776.3(19) | 5826.2(7) | 19.7(4) |
| C8 | 3115(3) | 3256(2) | 5487.0(8) | 25.5(4) |
| C9 | 5934(3) | 4850(2) | 5486.8(8) | 25.9(4) |
| C10 | 4420(2) | 4493.4(18) | 6393.3(7) | 18.4(4) |
| C11 | 5333(2) | 5696(2) | 6391.7(8) | 21.3(4) |
| C12 | 5271(3) | 6561.0(19) | 6859.2(9) | 24.5(4) |
| C13 | 4233(3) | 6168(2) | 7343.8(8) | 23.3(4) |
| C14 | 3268(2) | 4982(2) | 7354.8(8) | 21.6(4) |
| C15 | 3339(2) | 4140.6(18) | 6875.3(8) | 18.4(4) |
| O5 | 275(2) | 2601.3(15) | 7817.4(6) | 30.9(3) |
| O6 | -1436.5(18) | 3135.2(14) | 8601.0(6) | 25.3(3) |
| C16 | -1818(3) | 4457(2) | 7764.6(9) | 31.1(5) |
| C17 | -883(3) | 3317(2) | 8050.3(8) | 23.4(4) |
| C18 | -701(3) | 1964(2) | 8890.0(9) | 28.6(4) |
| C19 | -1459(4) | 1974(3) | 9504.7(10) | 41.9(6) |
| C20 | 2605.9(19) | 8478.6(11) | 8478.0(10) | 31.5(3) |
| C21 | 1579.3(19) | 3176.3(12) | 8412.9(10) | 31.0(3) |
| C22 | 1226(2) | 2789.0(13) | 9384.7(10) | 35.4(3) |
| C23 | 2071(3) | 1371.1(19) | 10412.1(15) | 63.8(6) |
| C24 | -1749(2) | 1912.4(14) | 9045.5(13) | 44.2(4) |
| C20 | 2605.9(19) | 8478.6(11) | 8478.0(10) | 31.5(3) |
| C21 | 1579.3(19) | 3176.3(12) | 8412.9(10) | 31.0(3) |
| C22 | 1226(2) | 2789.0(13) | 9384.7(10) | 35.4(3) |
| C23 | 2071(3) | 1371.1(19) | 10412.1(15) | 63.8(6) |
| C24 | -1749(2) | 1912.4(14) | 9045.5(13) | 44.2(4) |
| C20 | 2605.9(19) | 8478.6(11) | 8478.0(10) | 31.5(3) |

# 7. References

1. Wu, W. *et al.* Iridium Catalysts with f-Amphox Ligands: Asymmetric Hydrogenation of Simple Ketones. *Org. Lett.* **18**, 2938-2941, (2016).

2. Yu, J. *et al.* Readily Accessible and Highly Efficient Ferrocene-Based Amino-Phosphine-Alcohol (f-Amphol) Ligands for Iridium-Catalyzed Asymmetric Hydrogenation of Simple Ketones. *Chem. Eur. J.* **23**, 970-975, (2017).

3. Yu, J. *et al.* Iridium-Catalyzed Asymmetric Hydrogenation of Ketones with Accessible and Modular Ferrocene-Based Amino-phosphine Acid (f-Ampha) Ligands. *Org. Lett.* **19**, 690-693, (2017).

4. Smith, A. B., 3rd & Simov, V. Total synthesis of the marine natural product (-)-clavosolide A. A showcase for the Petasis-Ferrier union/rearrangement tactic. *Org. Lett.* **8**, 3315-3318, (2006).

5. Chemler, S. R. & Roush, W. R. Stereochemistry of the allylation and crotylation reactions of alpha-methyl-beta-hydroxy aldehydes with allyl- and crotyltrifluorosilanes. Synthesis of anti,anti-dipropionate stereotriads and stereodivergent pathways for the reactions with 2,3-anti- and 2,3-syn-alpha-methyl-beta-hydroxy aldehydes. *J. Org. Chem.* **68**, 1319-1333, (2003).

6. Saxena, A., Perez, F. & Krische, M. J. Ruthenium(0) Catalyzed Endiyne-alpha-Ketol [4 + 2] Cycloaddition: Convergent Assembly of Type II Polyketide Substructures via C-C Bond Forming Transfer Hydrogenation. *J. Am. Chem. Soc.* **137**, 5883-5886, (2015).

7. Jeżewski, A., Chajewska, K., Wielogórski, Z. & Jurczak, J. The asymmetric ene reaction of N-glyoxyloyl-(2R)-bornane-10,2-sultam with 1-pentene and 1-hexene. *Tetrahedron: Asymmetry* **8**, 1741-1749, (1997).

8. Hale, K. J. *et al.* Synthesis of the C(7)-C(22) sector of (+)-acutiphycin via O-directed double free radical alkyne hydrostannation with Ph3SnH/Et3B, double I-Sn exchange, and double Stille coupling. *Org. Lett.* **16**, 1168-1171, (2014).

9. Alcaraz, L. *et al.* Novel conversion of epoxides to one carbon homologated allylic alcohols by dimethylsulfonium methylide. *Tetrahedron Lett.* **35**, 5449-5452, (1994).

10. Ichikawa, A. & Ono, H. Preparation of single-enantiomer semiochemicals using 2-methoxy-2-(1-naphthyl)propionic acid and 2-methoxy-2-(9-phenanthryl)propionic acid. *Tetrahedron-Asymmetry* **16**, 2559-2568, (2005).

11. Wang, F.-D. & Yue, J.-M. A Total Synthesis of (+)- and (-)-Dihydrokavain with a Sonochemical Blaise Reaction as the Key Step. *European J. Org. Chem.* **2005**, 2575-2579, (2005).

12. Doherty, W. & Evans, P. Aminooxylation Horner-Wadsworth-Emmons Sequence for the Synthesis of Enantioenriched gamma-Functionalized Vinyl Sulfones. *J. Org. Chem.* **81**, 1416-1424, (2016).

13. Hedtmann, U. *et al.* Seitenkettenhomologe des 20-Hydroxyecdysons: Synthese, Konfigurationsbestimmung und biochemische Charakterisierung. *Angew. Chem., Int. Ed.* **101**, 1543-1546, (1989).

14. Nishizawa, M., Asai, Y. & Imagawa, H. TiCl4 induced anti-Markovnikov rearrangement. *Org. Lett.* **8**, 5793-5796, (2006).

15. Chang, C. F., Stefan, E. & Taylor, R. E. Total Synthesis and Structural Reassignment of Lyngbyaloside C Highlighted by Intermolecular Ketene Esterification. *Chem. Eur. J.* **21**, 10681-10686, (2015).

16. Martı́n, R., Islas, G., Moyano, A., Pericàs, M. A. & Riera, A. A new method for the enantioselective synthesis of N-Boc-α,α-disubstituted α-amino acids. *Tetrahedron* **57**, 6367-6374, (2001).

17. Lightburn, T. E., De Paolis, O. A., Cheng, K. H. & Tan, K. L. Regioselective hydroformylation of allylic alcohols. *Org. Lett.* **13**, 2686-2689, (2011).

18. S Yadav, J., Deshpande, P. K. & V M Sharma, G. An effective practical method for the synthesis of chiral propargyl alcohols. *Tetrahedron* **46**, 7033-7046, (1990).

19. Dorta, R. L., Rodríguez, M. S., Salazar, J. & Suárez, E. 1,3-Transposition of primary allylic alcohols: Synthesis of optically active secondary and tertiary allylic alcohols. *Tetrahedron Lett.* **38**, 4675-4678, (1997).

20. McClure, D. E., Arison, B. H. & Baldwin, J. J. Mode of nucleophilic addition to epichlorohydrin and related species: chiral aryloxymethyloxiranes. *J. Am. Chem. Soc.* **101**, 3666-3668, (1979).

21. Bredikhin, A. A. *et al.* Jacobsen-type enantioselective hydrolysis of aryl glycidyl ethers.31P NMR analysis of the enantiomeric composition of oxiranes. *Russ. Chem. Bull.* **53**, 213-218, (2004).

22. Coulthard, G., Erb, W. & Aggarwal, V. K. Stereocontrolled organocatalytic synthesis of prostaglandin PGF2α in seven steps. *Nature* **489**, 278-281, (2012).

23. Zhu, K., Hu, S., Liu, M., Peng, H. & Chen, F. E. Access to a Key Building Block for the Prostaglandin Family via Stereocontrolled Organocatalytic Baeyer-Villiger Oxidation. *Angew. Chem., Int. Ed.* **58**, 9923-9927, (2019).

24. Sheddan, N. A. & Mulzer, J. Cross metathesis as a general strategy for the synthesis of prostacyclin and prostaglandin analogues. *Org. Lett.* **8**, 3101-3104, (2006).

25. Corey, E. J., Schaaf, T. K., Huber, W., Koelliker, U. & Weinshenker, N. M. Total synthesis of prostaglandins F2-alpha and E2 as the naturally occurring forms. *J. Am. Chem. Soc.* **92**, 397-398, (1970).

26. Parve, O. *et al.* Lipase-catalysed acylation of prostanoids. *Bioorg. & Med. Chem. Lett.* **9**, 1853-1858, (1999).

27. Prevost, S. *et al.* Synthesis of Prostaglandin Analogues, Latanoprost and Bimatoprost, Using Organocatalysis via a Key Bicyclic Enal Intermediate. *Org. Lett.* **17**, 504-507, (2015).

28. Martynow, J. G. *et al.* A new synthetic approach to high-purity (15*R*)-latanoprost. *Eur. J. Org. Chem.* **2007**, 689-703, (2007).

29. Parve, O. *et al.* The tetrahydropyranyl-protected mandelic acid: a novel versatile chiral derivatising agent. *Tetrahedron: Asymmetry* **9**, 885-896, (1998).

30. Chen, Y., Yan, H., Chen, H. X., Weng, J. & Lu, G. An Improved and Efficient Process for the Preparation of (+)-cloprostenol. *Chirality* **27**, 392-396, (2015).

31. Dams, I. *et al.* A novel convergent synthesis of the potent antiglaucoma agent travoprost. *Tetrahedron* **69**, 1634-1648, (2013).

32. Boulton, L. T. *et al.* Synthesis of the Potent Antiglaucoma Agent, Travoprost. *Org. Process Res. & Dev.* **6**, 138-145, (2002).

33. Xu, C., Shen, X. & Hoveyda, A. H. In Situ Methylene Capping: A General Strategy for Efficient Stereoretentive Catalytic Olefin Metathesis. The Concept, ethodological Implications, and Applications to Synthesis of Biologically Active Compounds. *J. Am. Chem. Soc.* **139**, 10919-10928, (2017).
